# Supplementary material for: Genetic association mapping identifies single nucleotide polymorphisms in genes that affect abscisic acid levels in maize floral tissues during drought
Source: PubMed Central journal article supplement — J Exp Bot. 2010 Nov 17;62(2):701–16. doi: 10.1093/jxb/erq308 (PMC3003815; doi:10.1093/jxb/erq308), 2010-11-17
Supplement: supp_erq308_00049361-file001.pdf [file supp_erq308_00049361-file001.pdf]

**Supplement Table S1. Maize inbreds used in the association analysis. Maturity groups and identification number are indicated for lines phenotyped in the winter season of 2005 (TL05A) and 2006 (TL06A).** Further information on these inbreds available: [CIMMYT. 1998. A Complete Listing of Improved Maize Germplasm from CIMMYT. Maize Program Special Report. Mexico, D.F. ISBN: 970-648-023-4] and at [[http://www.cimmyt.org/english/wps/obtain\\_seed/germplas.htm](http://www.cimmyt.org/english/wps/obtain_seed/germplas.htm)]

| Maturity Group                                                   | pheno-typed in TL05A | pheno-typed in TL06A | used in assoc. analysis | Line # | Identification number |
|------------------------------------------------------------------|----------------------|----------------------|-------------------------|--------|-----------------------|
| <b>Used in Association analysis; phenotyped in 2005 and 2006</b> |                      |                      |                         |        |                       |
| 1                                                                | x                    | x                    | x                       | 2      | CML - 80              |
| 1                                                                | x                    | x                    | x                       | 5      | CML - 84              |
| 1                                                                | x                    | x                    | x                       | 6      | CML - 85              |
| 1                                                                | x                    | x                    | x                       | 7      | CML - 88              |
| 1                                                                | x                    | x                    | x                       | 8      | CML - 99              |
| 1                                                                | x                    | x                    | x                       | 9      | CML - 112             |
| 1                                                                | x                    | x                    | x                       | 11     | CML - 115             |
| 1                                                                | x                    | x                    | x                       | 12     | CML - 116             |
| 1                                                                | x                    | x                    | x                       | 14     | CML - 127             |
| 1                                                                | x                    | x                    | x                       | 15     | CML - 130             |
| 1                                                                | x                    | x                    | x                       | 16     | CML - 134             |
| 1                                                                | x                    | x                    | x                       | 17     | CML - 135             |
| 1                                                                | x                    | x                    | x                       | 18     | CML - 139             |
| 1                                                                | x                    | x                    | x                       | 19     | CML - 173             |
| 1                                                                | x                    | x                    | x                       | 20     | CML - 174             |
| 1                                                                | x                    | x                    | x                       | 21     | CML - 178             |
| 1                                                                | x                    | x                    | x                       | 22     | CML - 180             |
| 1                                                                | x                    | x                    | x                       | 23     | CML - 185             |
| 1                                                                | x                    | x                    | x                       | 24     | CML - 187             |
| 1                                                                | x                    | x                    | x                       | 27     | CML - 218             |
| 1                                                                | x                    | x                    | x                       | 28     | CML - 219             |
| 1                                                                | x                    | x                    | x                       | 29     | CML - 220             |
| 1                                                                | x                    | x                    | x                       | 30     | CML - 221             |
| 1                                                                | x                    | x                    | x                       | 31     | CML - 222             |
| 1                                                                | x                    | x                    | x                       | 34     | CML - 323             |
| 1                                                                | x                    | x                    | x                       | 35     | CML - 324             |
| 1                                                                | x                    | x                    | x                       | 36     | CML - 325             |
| 1                                                                | x                    | x                    | x                       | 38     | CML - 328             |
| 1                                                                | x                    | x                    | x                       | 39     | CML - 330             |
| 1                                                                | x                    | x                    | x                       | 40     | CML - 333             |
| 1                                                                | x                    | x                    | x                       | 41     | CML - 338             |
| 1                                                                | x                    | x                    | x                       | 44     | CML - 366             |
| 1                                                                | x                    | x                    | x                       | 45     | CML - 367             |
| 1                                                                | x                    | x                    | x                       | 46     | CML - 368             |
| 1                                                                | x                    | x                    | x                       | 47     | CML - 369             |

| Maturity Group | pheno-typed in TL05A | pheno-typed in TL06A | used in assoc. analysis | Line # | Identification number                                             |
|----------------|----------------------|----------------------|-------------------------|--------|-------------------------------------------------------------------|
| 1              | x                    | x                    | x                       | 48     | CML - 418                                                         |
| 1              | x                    | x                    | x                       | 49     | CML - 420                                                         |
| 1              | x                    | x                    | x                       | 51     | CML - 422                                                         |
| 1              | x                    | x                    | x                       | 54     | CML - 426                                                         |
| 1              | x                    | x                    | x                       | 55     | CML - 428                                                         |
| 1              | x                    | x                    | x                       | 57     | CML - 440                                                         |
| 1              | x                    | x                    | x                       | 59     | CML - 471                                                         |
| 1              | x                    | x                    | x                       | 61     | CML - 474                                                         |
| 1              | x                    | x                    | x                       | 62     | CML - 485                                                         |
| 1              | x                    | x                    | x                       | 64     | 6996 BULK [COMPE 2/P43-SR/COMPE]FS# 20-1-1-B-1-B                  |
| 1              | x                    | x                    | x                       | 65     | DRB-F2-60-1-1-1                                                   |
| 1              | x                    | x                    | x                       | 66     | INTA-F2-192-2-1-1-1                                               |
| 1              | x                    | x                    | x                       | 67     | DTPWC9-F115-1-4-1-1-B                                             |
| 1              | x                    | x                    | x                       | 68     | DTPWC9-F73-2-1-1-1-B                                              |
| 1              | x                    | x                    | x                       | 70     | DTPWC9-F16-1-4-1-1-B                                              |
| 1              | x                    | x                    | x                       | 71     | DTPYC9-F69-3-1-1-2-B                                              |
| 1              | x                    | x                    | x                       | 73     | DTPYC9-F143-5-4-1-2-B                                             |
| 1              | x                    | x                    | x                       | 74     | DTPYC9-F74-1-1-1-1-B                                              |
| 1              | x                    | x                    | x                       | 75     | DTPYC9-F134-3-1-B                                                 |
| 1              | x                    | x                    | x                       | 76     | DTPYC9-F125-2-8-1-1-B                                             |
| 1              | x                    | x                    | x                       | 77     | DTPYC9-F13-2-1-1-1-B                                              |
| 1              | x                    | x                    | x                       | 78     | CL-04935 (PR8549xP23C2)-5-1-3-B*14                                |
| 1              | x                    | x                    | x                       | 79     | CL-G1624 G16C23H173-1-2-B-3-2-B*7                                 |
| 1              | x                    | x                    | x                       | 80     | CL-G1839 G18SeqC3-17-1-1-2-2-B*5                                  |
| 1              | x                    | x                    | x                       | 83     | Tx114                                                             |
| 1              | x                    | x                    | x                       | 84     | (P69Qc3HC107-1-1#-4-2#-4-B-B-1-4-B-B-B-B-B X CML 193)-B-B-2-B-B-B |
| 1              | x                    | x                    | x                       | 85     | Pop. 69 Templado Amarillo QPM-B-B-B1-6-B-B-B                      |
| 1              | x                    | x                    | x                       | 86     | Pop. 70 Templado Amarillo Dentado QPM-B-B-B2-8-B-B-B              |
| 1              | x                    | x                    | x                       | 91     | (NC258/NC300)-B-2-2-B-B                                           |
| 1              | x                    | x                    | x                       | 95     | ((B104/NC300)x(CML 415/B104))-4-2-B-B                             |
| 1              | x                    | x                    | x                       | 96     | ((B104/NC300)x(CML285/B104))-2-3-B-B                              |
| 1              | x                    | x                    | x                       | 99     | (CML 326/B104)-B-9-B-B-B-B                                        |
| 1              | x                    | x                    | x                       | 101    | (CML288/NC300)-B-9-B1-B-B-B                                       |
| 1              | x                    | x                    | x                       | 102    | (NC300/Tx772)-B-1-B2-B-B                                          |
| 1              | x                    | x                    | x                       | 108    | LAMA2002-46-2-B                                                   |
| 1              | x                    | x                    | x                       | 109    | LAMA2002-53-5-B                                                   |
| 1              | x                    | x                    | x                       | 110    | LAMA2002-58-4-B                                                   |
| 1              | x                    | x                    | x                       | 111    | LAMA2002-60-9-B                                                   |
| 1              | x                    | x                    | x                       | 112    | (Tx601 x B104-B/B110 x FR2128-B)-B-B-4-B-B-B                      |
| 1              | x                    | x                    | x                       | 113    | Pop.147-F2#132-1-1-B-2-B-B-B-B                                    |
| 1              | x                    | x                    | x                       | 114    | P84c3BcxLLTtardAsiAxMIRT F41-2-1-2-2-B-B                          |
| 1              | x                    | x                    | x                       | 115    | CTS013174 / SW1(S)C11-42-1-B-B-1-3-BBBB/Nei9202-B                 |

| Maturity Group | pheno-typed in TL05A | pheno-typed in TL06A | used in assoc. analysis | Line # | Identification number |
|----------------|----------------------|----------------------|-------------------------|--------|-----------------------|
| 1              | x                    | x                    | x                       | 116    | Nei 9008-B-B-B        |
| 1              | x                    | x                    | x                       | 117    | Nei 402011-B-B-B      |
| 1              | x                    | x                    | x                       | 119    | Nei 402025-B-B-B      |
| 1              | x                    | x                    | x                       | 120    | Nei 402026-B-B-B      |
| 2              | x                    | x                    | x                       | 121    | CML - 4               |
| 2              | x                    | x                    | x                       | 122    | CML - 20              |
| 2              | x                    | x                    | x                       | 123    | CML - 22              |
| 2              | x                    | x                    | x                       | 124    | CML - 23              |
| 2              | x                    | x                    | x                       | 125    | CML - 26              |
| 2              | x                    | x                    | x                       | 126    | CML - 29              |
| 2              | x                    | x                    | x                       | 127    | CML - 31              |
| 2              | x                    | x                    | x                       | 128    | CML - 35              |
| 2              | x                    | x                    | x                       | 129    | CML - 37              |
| 2              | x                    | x                    | x                       | 130    | CML - 39              |
| 2              | x                    | x                    | x                       | 131    | CML - 40              |
| 2              | x                    | x                    | x                       | 133    | CML - 50              |
| 2              | x                    | x                    | x                       | 136    | CML - 68              |
| 2              | x                    | x                    | x                       | 137    | CML - 69              |
| 2              | x                    | x                    | x                       | 138    | CML - 86              |
| 2              | x                    | x                    | x                       | 139    | CML - 87              |
| 2              | x                    | x                    | x                       | 140    | CML - 89              |
| 2              | x                    | x                    | x                       | 141    | CML - 91              |
| 2              | x                    | x                    | x                       | 142    | CML - 92              |
| 2              | x                    | x                    | x                       | 143    | CML - 94              |
| 2              | x                    | x                    | x                       | 144    | CML - 95              |
| 2              | x                    | x                    | x                       | 145    | CML - 96              |
| 2              | x                    | x                    | x                       | 146    | CML - 97              |
| 2              | x                    | x                    | x                       | 147    | CML - 98              |
| 2              | x                    | x                    | x                       | 149    | CML - 101             |
| 2              | x                    | x                    | x                       | 150    | CML - 103             |
| 2              | x                    | x                    | x                       | 151    | CML - 107             |
| 2              | x                    | x                    | x                       | 152    | CML - 108             |
| 2              | x                    | x                    | x                       | 153    | CML - 111             |
| 2              | x                    | x                    | x                       | 154    | CML - 114             |
| 2              | x                    | x                    | x                       | 155    | CML - 118             |
| 2              | x                    | x                    | x                       | 156    | CML - 121             |
| 2              | x                    | x                    | x                       | 157    | CML - 122             |
| 2              | x                    | x                    | x                       | 158    | CML - 123             |
| 2              | x                    | x                    | x                       | 159    | CML - 129             |
| 2              | x                    | x                    | x                       | 160    | CML - 132             |
| 2              | x                    | x                    | x                       | 161    | CML - 138             |
| 2              | x                    | x                    | x                       | 162    | CML - 140             |

| Maturity Group | pheno-typed in TL05A | pheno-typed in TL06A | used in assoc. analysis | Line # | Identification number |
|----------------|----------------------|----------------------|-------------------------|--------|-----------------------|
| 2              | x                    | x                    | x                       | 163    | CML - 141             |
| 2              | x                    | x                    | x                       | 164    | CML - 154             |
| 2              | x                    | x                    | x                       | 165    | CML - 157             |
| 2              | x                    | x                    | x                       | 167    | CML - 161             |
| 2              | x                    | x                    | x                       | 168    | CML - 162             |
| 2              | x                    | x                    | x                       | 169    | CML - 163             |
| 2              | x                    | x                    | x                       | 170    | CML - 166             |
| 2              | x                    | x                    | x                       | 171    | CML - 168             |
| 2              | x                    | x                    | x                       | 172    | CML - 169             |
| 2              | x                    | x                    | x                       | 173    | CML - 170             |
| 2              | x                    | x                    | x                       | 174    | CML - 171             |
| 2              | x                    | x                    | x                       | 175    | CML - 172             |
| 2              | x                    | x                    | x                       | 176    | CML - 175             |
| 2              | x                    | x                    | x                       | 178    | CML - 182             |
| 2              | x                    | x                    | x                       | 179    | CML - 186             |
| 2              | x                    | x                    | x                       | 180    | CML - 191             |
| 2              | x                    | x                    | x                       | 181    | CML - 192             |
| 2              | x                    | x                    | x                       | 185    | CML - 223             |
| 2              | x                    | x                    | x                       | 187    | CML - 225             |
| 2              | x                    | x                    | x                       | 188    | CML - 226             |
| 2              | x                    | x                    | x                       | 189    | CML - 228             |
| 2              | x                    | x                    | x                       | 190    | CML - 229             |
| 2              | x                    | x                    | x                       | 191    | CML - 230             |
| 2              | x                    | x                    | x                       | 192    | CML - 231             |
| 2              | x                    | x                    | x                       | 193    | CML - 232             |
| 2              | x                    | x                    | x                       | 196    | CML - 249             |
| 2              | x                    | x                    | x                       | 197    | CML - 259             |
| 2              | x                    | x                    | x                       | 198    | CML - 261             |
| 2              | x                    | x                    | x                       | 199    | CML - 269             |
| 2              | x                    | x                    | x                       | 200    | CML - 282             |
| 2              | x                    | x                    | x                       | 201    | CML - 283             |
| 2              | x                    | x                    | x                       | 202    | CML - 286             |
| 2              | x                    | x                    | x                       | 204    | CML - 306             |
| 2              | x                    | x                    | x                       | 205    | CML - 310             |
| 2              | x                    | x                    | x                       | 208    | CML - 316             |
| 2              | x                    | x                    | x                       | 209    | CML - 317             |
| 2              | x                    | x                    | x                       | 210    | CML - 321             |
| 2              | x                    | x                    | x                       | 211    | CML - 322             |
| 2              | x                    | x                    | x                       | 213    | CML - 331             |
| 2              | x                    | x                    | x                       | 214    | CML - 334             |
| 2              | x                    | x                    | x                       | 216    | CML - 360             |
| 2              | x                    | x                    | x                       | 217    | CML - 361             |

| Maturity Group | pheno-typed in TL05A | pheno-typed in TL06A | used in assoc. analysis | Line # | Identification number                         |
|----------------|----------------------|----------------------|-------------------------|--------|-----------------------------------------------|
| 2              | x                    | x                    | x                       | 220    | CML - 371                                     |
| 2              | x                    | x                    | x                       | 221    | CML - 372                                     |
| 2              | x                    | x                    | x                       | 222    | CML - 373                                     |
| 2              | x                    | x                    | x                       | 223    | CML - 374                                     |
| 2              | x                    | x                    | x                       | 224    | CML - 376                                     |
| 2              | x                    | x                    | x                       | 225    | CML - 379                                     |
| 2              | x                    | x                    | x                       | 226    | CML - 381                                     |
| 2              | x                    | x                    | x                       | 227    | CML - 382                                     |
| 2              | x                    | x                    | x                       | 229    | CML - 411                                     |
| 2              | x                    | x                    | x                       | 230    | CML - 416                                     |
| 2              | x                    | x                    | x                       | 231    | CML - 431                                     |
| 2              | x                    | x                    | x                       | 232    | CML - 432                                     |
| 2              | x                    | x                    | x                       | 233    | CML - 450                                     |
| 2              | x                    | x                    | x                       | 234    | CML - 451                                     |
| 2              | x                    | x                    | x                       | 235    | CML - 465                                     |
| 2              | x                    | x                    | x                       | 240    | CML - 479                                     |
| 2              | x                    | x                    | x                       | 242    | CML - 482                                     |
| 2              | x                    | x                    | x                       | 243    | CML - 483                                     |
| 2              | x                    | x                    | x                       | 244    | CML - 484                                     |
| 2              | x                    | x                    | x                       | 245    | CML - 490                                     |
| 2              | x                    | x                    | x                       | 246    | CML - 493                                     |
| 2              | x                    | x                    | x                       | 247    | CML - 495                                     |
| 2              | x                    | x                    | x                       | 248    | P1                                            |
| 2              | x                    | x                    | x                       | 249    | H-16                                          |
| 2              | x                    | x                    | x                       | 250    | DTP2WC4H255-1-2-2-BB/LATA-F2-138              |
| 2              | x                    | x                    | x                       | 252    | DTPWC8F347-1-3-1-B                            |
| 2              | x                    | x                    | x                       | 253    | DTPWC8F324-1-1-1-#-B                          |
| 2              | x                    | x                    | x                       | 254    | DTPWC8F266-1-1-1-#-B                          |
| 2              | x                    | x                    | x                       | 255    | DTPWC9-F109-2-6-1-1-B                         |
| 2              | x                    | x                    | x                       | 256    | DTPWC9-F2-3-2-1-1-B                           |
| 2              | x                    | x                    | x                       | 257    | DTPWC9-F103-2-1-1-1-B                         |
| 2              | x                    | x                    | x                       | 259    | DTPYC9-F11-2-3-1-2-B                          |
| 2              | x                    | x                    | x                       | 260    | DTPYC9-F46-3-9-1-2-B                          |
| 2              | x                    | x                    | x                       | 261    | DTPYC9-F65-2-3-1-1-B                          |
| 2              | x                    | x                    | x                       | 262    | DTPYC9-F116-2-1-1-1-B                         |
| 2              | x                    | x                    | x                       | 263    | DTPYC9-F38-4-6-1-1-B                          |
| 2              | x                    | x                    | x                       | 264    | La Posta Seq.C0 F12-2-1-1                     |
| 2              | x                    | x                    | x                       | 265    | CL-02841 Ac8928-40-1-1-1-1-B                  |
| 2              | x                    | x                    | x                       | 266    | CL-04930 (P49C2H12-1-4xPR8549-1-1)-1-1-3-B*8  |
| 2              | x                    | x                    | x                       | 267    | CL-04934 (P49C2H12-5-4xP23C2-11-1)-2-2-2-B*10 |
| 2              | x                    | x                    | x                       | 268    | CL-G1632 G16C20MH44-#-3-3-1-B*5               |
| 2              | x                    | x                    | x                       | 271    | CL-G2606 G26SeqC1-149-1-1-2-1-2-1-BB          |

| Maturity Group | pheno-typed in TL05A | pheno-typed in TL06A | used in assoc. analysis | Line # | Identification number                                                       |
|----------------|----------------------|----------------------|-------------------------|--------|-----------------------------------------------------------------------------|
| 2              | x                    | x                    | x                       | 272    | CL-G2609 G26C23-75-1-1-2-1-B*5                                              |
| 2              | x                    | x                    | x                       | 273    | CL-G2611 G26SEQF135-3-3-1-1-1-2-BB                                          |
| 2              | x                    | x                    | x                       | 275    | CL-QRCWQ15                                                                  |
| 2              | x                    | x                    | x                       | 277    | CL-SCBY03                                                                   |
| 2              | x                    | x                    | x                       | 278    | CL-SPLW05 SPLC7F275-1-1-1-1-1-B-B                                           |
| 2              | x                    | x                    | x                       | 280    | ((Ko326y x Tx806)-6-1-1-1-B-B/CML161)x(Tx802/CML161))-1-B-B-B               |
| 2              | x                    | x                    | x                       | 284    | ((CML 408/B104)x(CML 411/B104))-1-1-B-B                                     |
| 2              | x                    | x                    | x                       | 285    | ((CML285/B104)x(CML288/NC300))-2-1-B-B                                      |
| 2              | x                    | x                    | x                       | 286    | (CML285/NC300)-B-6-B-B-B-B                                                  |
| 2              | x                    | x                    | x                       | 289    | LAMA2002-10-1-B                                                             |
| 2              | x                    | x                    | x                       | 290    | LAMA2002-20-6-B                                                             |
| 2              | x                    | x                    | x                       | 291    | LAMA2002-43-2-B                                                             |
| 2              | x                    | x                    | x                       | 292    | LAMA2002-61-1-B                                                             |
| 2              | x                    | x                    | x                       | 293    | MBR C6 Am F9-2-B-#-3-1-B-B-B-B-B                                            |
| 2              | x                    | x                    | x                       | 296    | SRR-C1 SA3MH32-4-3-B-1-1-2-B-B                                              |
| 2              | x                    | x                    | x                       | 297    | P390Am/CML c4 F253-B-2-2-4-1-B-B                                            |
| 2              | x                    | x                    | x                       | 298    | AMATLC0HS71-1-1-2-1-1-1-BBBB-B-B-B                                          |
| 2              | x                    | x                    | x                       | 299    | Pop.28C9HC113-3-1-4-B*8-B-B-B                                               |
| 2              | x                    | x                    | x                       | 300    | P84c3BcxP391c3 F38-1-3-2-2-1-1-2-B-B                                        |
| 2              | x                    | x                    | x                       | 301    | P84c3BcxLine recycle LLTpreAsiaxMIRT F59-2-1-1-1-B-B                        |
| 2              | x                    | x                    | x                       | 302    | MIRTC4Am F17-B-2-1-B-B                                                      |
| 2              | x                    | x                    | x                       | 303    | P391c2 F22-1-1-2-1-B-B-B                                                    |
| 2              | x                    | x                    | x                       | 305    | MBR-ET(W) C1 F139-2-1-B-2-B-B-B-B-B-BxMBR C5 Bc F13-3-1-2-B-B-B-B-1-2-B-B-B |
| 2              | x                    | x                    | x                       | 310    | Cuba/Guad C3 F53-3-1-1-B-B-B                                                |
| 2              | x                    | x                    | x                       | 311    | P591c4 F3-1-2-2-B-B-B                                                       |
| 2              | x                    | x                    | x                       | 312    | P591c4 F55-2-2-2-B-B-B                                                      |
| 2              | x                    | x                    | x                       | 313    | MIRTC5 Bco F62-2-2-1-1-2-1-B-B                                              |
| 2              | x                    | x                    | x                       | 314    | Pob. 391 C4 F91-1-2-1-B-B                                                   |
| 2              | x                    | x                    | x                       | 316    | P84c3BcxMIRTC5 Bco F10-1-2-2-2-3-1-B-B                                      |
| 2              | x                    | x                    | x                       | 317    | P84c3BcxMIRTC5 Bco F80-4-2-1-4-1-1-B-B                                      |
| 2              | x                    | x                    | x                       | 318    | P84c3BcxP390Bco/CML c4 F92-B-2-1-2-1-B-B                                    |
| 3              | x                    | x                    | x                       | 321    | CML - 3                                                                     |
| 3              | x                    | x                    | x                       | 322    | CML - 5                                                                     |
| 3              | x                    | x                    | x                       | 324    | CML - 9                                                                     |
| 3              | x                    | x                    | x                       | 325    | CML - 12                                                                    |
| 3              | x                    | x                    | x                       | 326    | CML - 13                                                                    |
| 3              | x                    | x                    | x                       | 328    | CML - 15                                                                    |
| 3              | x                    | x                    | x                       | 329    | CML - 16                                                                    |
| 3              | x                    | x                    | x                       | 330    | CML - 17                                                                    |
| 3              | x                    | x                    | x                       | 331    | CML - 24                                                                    |
| 3              | x                    | x                    | x                       | 332    | CML - 27                                                                    |
| 3              | x                    | x                    | x                       | 333    | CML - 28                                                                    |

| Maturity Group | pheno-typed in TL05A | pheno-typed in TL06A | used in assoc. analysis | Line # | Identification number |
|----------------|----------------------|----------------------|-------------------------|--------|-----------------------|
| 3              | x                    | x                    | x                       | 334    | CML - 32              |
| 3              | x                    | x                    | x                       | 335    | CML - 38              |
| 3              | x                    | x                    | x                       | 337    | CML - 43              |
| 3              | x                    | x                    | x                       | 340    | CML - 47              |
| 3              | x                    | x                    | x                       | 342    | CML - 49              |
| 3              | x                    | x                    | x                       | 343    | CML - 51              |
| 3              | x                    | x                    | x                       | 350    | CML - 142             |
| 3              | x                    | x                    | x                       | 351    | CML - 144             |
| 3              | x                    | x                    | x                       | 352    | CML - 147             |
| 3              | x                    | x                    | x                       | 353    | CML - 150             |
| 3              | x                    | x                    | x                       | 354    | CML - 153             |
| 3              | x                    | x                    | x                       | 355    | CML - 158             |
| 3              | x                    | x                    | x                       | 356    | CML - 159             |
| 3              | x                    | x                    | x                       | 357    | CML - 165             |
| 3              | x                    | x                    | x                       | 360    | CML - 201             |
| 3              | x                    | x                    | x                       | 361    | CML - 202             |
| 3              | x                    | x                    | x                       | 362    | CML - 204             |
| 3              | x                    | x                    | x                       | 363    | CML - 206             |
| 3              | x                    | x                    | x                       | 364    | CML - 208             |
| 3              | x                    | x                    | x                       | 365    | CML - 216             |
| 3              | x                    | x                    | x                       | 366    | CML - 238             |
| 3              | x                    | x                    | x                       | 368    | CML - 248             |
| 3              | x                    | x                    | x                       | 370    | CML - 254             |
| 3              | x                    | x                    | x                       | 371    | CML - 257             |
| 3              | x                    | x                    | x                       | 372    | CML - 260             |
| 3              | x                    | x                    | x                       | 373    | CML - 268             |
| 3              | x                    | x                    | x                       | 374    | CML - 270             |
| 3              | x                    | x                    | x                       | 377    | CML - 274             |
| 3              | x                    | x                    | x                       | 379    | CML - 279             |
| 3              | x                    | x                    | x                       | 380    | CML - 281             |
| 3              | x                    | x                    | x                       | 381    | CML - 285             |
| 3              | x                    | x                    | x                       | 382    | CML - 287             |
| 3              | x                    | x                    | x                       | 383    | CML - 289             |
| 3              | x                    | x                    | x                       | 384    | CML - 290             |
| 3              | x                    | x                    | x                       | 386    | CML - 298             |
| 3              | x                    | x                    | x                       | 387    | CML - 307             |
| 3              | x                    | x                    | x                       | 388    | CML - 319             |
| 3              | x                    | x                    | x                       | 389    | CML - 320             |
| 3              | x                    | x                    | x                       | 390    | CML - 327             |
| 3              | x                    | x                    | x                       | 392    | CML - 340             |
| 3              | x                    | x                    | x                       | 393    | CML - 341             |
| 3              | x                    | x                    | x                       | 395    | CML - 344             |

| Maturity Group | pheno-typed in TL05A | pheno-typed in TL06A | used in assoc. analysis | Line # | Identification number                           |
|----------------|----------------------|----------------------|-------------------------|--------|-------------------------------------------------|
| 3              | x                    | x                    | x                       | 397    | CML - 364                                       |
| 3              | x                    | x                    | x                       | 398    | CML - 377                                       |
| 3              | x                    | x                    | x                       | 399    | CML - 378                                       |
| 3              | x                    | x                    | x                       | 400    | CML - 384                                       |
| 3              | x                    | x                    | x                       | 401    | CML - 386                                       |
| 3              | x                    | x                    | x                       | 402    | CML - 387                                       |
| 3              | x                    | x                    | x                       | 403    | CML - 389                                       |
| 3              | x                    | x                    | x                       | 405    | CML - 395                                       |
| 3              | x                    | x                    | x                       | 406    | CML - 397                                       |
| 3              | x                    | x                    | x                       | 408    | CML - 401                                       |
| 3              | x                    | x                    | x                       | 409    | CML - 402                                       |
| 3              | x                    | x                    | x                       | 412    | CML - 405                                       |
| 3              | x                    | x                    | x                       | 413    | CML - 406                                       |
| 3              | x                    | x                    | x                       | 414    | CML - 407                                       |
| 3              | x                    | x                    | x                       | 415    | CML - 408                                       |
| 3              | x                    | x                    | x                       | 416    | CML - 412                                       |
| 3              | x                    | x                    | x                       | 417    | CML - 413                                       |
| 3              | x                    | x                    | x                       | 418    | CML - 415                                       |
| 3              | x                    | x                    | x                       | 419    | CML - 430                                       |
| 3              | x                    | x                    | x                       | 420    | CML - 433                                       |
| 3              | x                    | x                    | x                       | 421    | CML - 442                                       |
| 3              | x                    | x                    | x                       | 423    | CML - 446                                       |
| 3              | x                    | x                    | x                       | 426    | CML - 454                                       |
| 3              | x                    | x                    | x                       | 428    | CML - 468                                       |
| 3              | x                    | x                    | x                       | 429    | CML - 476                                       |
| 3              | x                    | x                    | x                       | 430    | CML - 494                                       |
| 3              | x                    | x                    | x                       | 431    | CML - 496                                       |
| 3              | x                    | x                    | x                       | 432    | CML - 497                                       |
| 3              | x                    | x                    | x                       | 433    | P2                                              |
| 3              | x                    | x                    | x                       | 436    | CML-395/CML444 B-4-1-3-1                        |
| 3              | x                    | x                    | x                       | 437    | SW1SR/COMPE1-W###52#-19-5-1-B*5                 |
| 3              | x                    | x                    | x                       | 438    | DTPWC8F317-1-1-1-#-B                            |
| 3              | x                    | x                    | x                       | 439    | La Posta Seq.C4 F140-1-1-1                      |
| 3              | x                    | x                    | x                       | 440    | La Posta Seq.C4 F273-2-2-1                      |
| 3              | x                    | x                    | x                       | 441    | CL-04343                                        |
| 3              | x                    | x                    | x                       | 442    | CL-Q6203                                        |
| 3              | x                    | x                    | x                       | 443    | CL-RCW01                                        |
| 3              | x                    | x                    | x                       | 445    | MBR/MDR Am C4 F55-2-B-#-1-1-B-B-B-B-B           |
| 3              | x                    | x                    | x                       | 446    | 1760A A1Am x1751A y 52A Comp.-B-1-2-B-B-B-B-B-B |
| 3              | x                    | x                    | x                       | 447    | 761B B2 Bco x751B-B-1-1-B-B-B-B-B-B             |
| 3              | x                    | x                    | x                       | 448    | Cuba/Guad C3 F42-2-1-1-B-B-B                    |
| 3              | x                    | x                    | x                       | 449    | Cuba/Guad C3 F125-2-2-1-B-B-B                   |



| Maturity Group                                                       | pheno-typed in TL05A | pheno-typed in TL06A | used in assoc. analysis | Line # | Identification number                                                   |
|----------------------------------------------------------------------|----------------------|----------------------|-------------------------|--------|-------------------------------------------------------------------------|
| 3                                                                    | x                    | x                    | x                       | 450    | P591c4 1y2 GEN F3-1-1-2-B-B-B                                           |
| 3                                                                    | x                    | x                    | x                       | 451    | P591c4 1y2 GEN F205-1-1-1-B-B-B                                         |
| 3                                                                    | x                    | x                    | x                       | 452    | MIRTC5Am F24-2-1-1-3-1-2-B-B                                            |
| 3                                                                    | x                    | x                    | x                       | 453    | MBR/MDR C4 Bc F34-1-B-#-1-1-B-B-B-B-B                                   |
| 3                                                                    | x                    | x                    | x                       | 454    | MBR/MDR C3 Bc/ MBR C5 Bc F59-1-B-#-1-2-B-B-B-B-B                        |
| 3                                                                    | x                    | x                    | x                       | 458    | Cuba/Guad C3 F110-2-2-1-B-B-B                                           |
| 3                                                                    | x                    | x                    | x                       | 459    | P590 C7 Blancos F57-1-3-1-B-B-B                                         |
| 3                                                                    | x                    | x                    | x                       | 460    | P391 c4 Bco F105-1-2-3-B-B                                              |
| <b>Used in Association analysis; phenotyped in 2005</b>              |                      |                      |                         |        |                                                                         |
| 1                                                                    | x                    |                      | x                       | 25     | CML - 189                                                               |
| 1                                                                    | x                    |                      | x                       | 37     | CML - 326                                                               |
| 1                                                                    | x                    |                      | x                       | 52     | CML - 423                                                               |
| 1                                                                    | x                    |                      | x                       | 58     | CML - 470                                                               |
| 1                                                                    | x                    |                      | x                       | 60     | CML - 473                                                               |
| 2                                                                    | x                    |                      | x                       | 258    | DTPWC9-F18-1-3-1-1-B                                                    |
| 2                                                                    | x                    |                      | x                       | 294    | CML 329/MBR C3 Am F25-2-1-1-B-B-B                                       |
| 2                                                                    | x                    |                      | x                       | 304    | MBR C6 Bc F234-1-B-#-1-1-B-B-B-B-B                                      |
| 2                                                                    | x                    |                      | x                       | 309    | Ejura/Sin35 C4 F52-2-2-2-B-B-B                                          |
| 3                                                                    | x                    |                      | x                       | 341    | CML - 48                                                                |
| 3                                                                    | x                    |                      | x                       | 349    | CML - 133                                                               |
| 3                                                                    | x                    |                      | x                       | 358    | CML - 196                                                               |
| 3                                                                    | x                    |                      | x                       | 394    | CML - 343                                                               |
| <b>Not used in Association analysis; phenotyped in 2005 and 2006</b> |                      |                      |                         |        |                                                                         |
| 1                                                                    | x                    | x                    |                         | 1      | CML - 75                                                                |
| 1                                                                    | x                    | x                    |                         | 4      | CML - 83                                                                |
| 1                                                                    | x                    | x                    |                         | 10     | CML - 113                                                               |
| 1                                                                    | x                    | x                    |                         | 13     | CML - 124                                                               |
| 1                                                                    | x                    | x                    |                         | 26     | CML - 217                                                               |
| 1                                                                    | x                    | x                    |                         | 42     | CML - 355                                                               |
| 1                                                                    | x                    | x                    |                         | 43     | CML - 356                                                               |
| 1                                                                    | x                    | x                    |                         | 53     | CML - 425                                                               |
| 1                                                                    | x                    | x                    |                         | 56     | CML - 429                                                               |
| 1                                                                    | x                    | x                    |                         | 69     | DTPWC9-F120-3-1-1-1-B                                                   |
| 1                                                                    | x                    | x                    |                         | 81     | CL-G1844 G18SeqC3F245-2-2-2-1-1-B*4                                     |
| 1                                                                    | x                    | x                    |                         | 87     | ((NC300-B-B/(Do940y x Tx802)-4-2-1-1-1-B-B)x(Tx770-B/CML161))-B-B-2-B-B |
| 1                                                                    | x                    | x                    |                         | 88     | (B97-B-B/Do940y)x(NC300/CML161)-B2-B-2-B-B                              |
| 1                                                                    | x                    | x                    |                         | 89     | ((Ko326y x Tx806)-6-1-1-1-B-B/B104))-B-B-B-B                            |
| 1                                                                    | x                    | x                    |                         | 90     | (CML 323/NC300)-B-1-1-B-B                                               |
| 1                                                                    | x                    | x                    |                         | 93     | ((CML288/NC300)x(B97/Tx772))-3-4-B-B                                    |
| 1                                                                    | x                    | x                    |                         | 100    | (CML 326/Tx772)-B-11-B-B-B-B                                            |

| Maturity Group | pheno-typed in TL05A | pheno-typed in TL06A | used in assoc. analysis | Line # | Identification number                                                                                                                                                                                                                                            |
|----------------|----------------------|----------------------|-------------------------|--------|------------------------------------------------------------------------------------------------------------------------------------------------------------------------------------------------------------------------------------------------------------------|
| 1              | x                    | x                    |                         | 103    | (B97x CML 326-B/Tx770 x A645)-2-2-B-B-B-B                                                                                                                                                                                                                        |
| 2              | x                    | x                    |                         | 132    | CML - 41                                                                                                                                                                                                                                                         |
| 2              | x                    | x                    |                         | 134    | CML - 58                                                                                                                                                                                                                                                         |
| 2              | x                    | x                    |                         | 135    | CML - 60                                                                                                                                                                                                                                                         |
| 2              | x                    | x                    |                         | 148    | CML - 100                                                                                                                                                                                                                                                        |
| 2              | x                    | x                    |                         | 166    | CML - 160                                                                                                                                                                                                                                                        |
| 2              | x                    | x                    |                         | 177    | CML - 181                                                                                                                                                                                                                                                        |
| 2              | x                    | x                    |                         | 182    | CML - 194                                                                                                                                                                                                                                                        |
| 2              | x                    | x                    |                         | 183    | CML - 212                                                                                                                                                                                                                                                        |
| 2              | x                    | x                    |                         | 184    | CML - 213                                                                                                                                                                                                                                                        |
| 2              | x                    | x                    |                         | 194    | CML - 233                                                                                                                                                                                                                                                        |
| 2              | x                    | x                    |                         | 195    | CML - 235                                                                                                                                                                                                                                                        |
| 2              | x                    | x                    |                         | 203    | CML - 288                                                                                                                                                                                                                                                        |
| 2              | x                    | x                    |                         | 206    | CML - 311                                                                                                                                                                                                                                                        |
| 2              | x                    | x                    |                         | 207    | CML - 315                                                                                                                                                                                                                                                        |
| 2              | x                    | x                    |                         | 212    | CML - 329                                                                                                                                                                                                                                                        |
| 2              | x                    | x                    |                         | 215    | CML - 346                                                                                                                                                                                                                                                        |
| 2              | x                    | x                    |                         | 218    | CML - 362                                                                                                                                                                                                                                                        |
| 2              | x                    | x                    |                         | 219    | CML - 370                                                                                                                                                                                                                                                        |
| 2              | x                    | x                    |                         | 228    | CML - 394                                                                                                                                                                                                                                                        |
| 2              | x                    | x                    |                         | 236    | CML - 466                                                                                                                                                                                                                                                        |
| 2              | x                    | x                    |                         | 237    | CML - 467                                                                                                                                                                                                                                                        |
| 2              | x                    | x                    |                         | 238    | CML - 469                                                                                                                                                                                                                                                        |
| 2              | x                    | x                    |                         | 241    | CML - 481                                                                                                                                                                                                                                                        |
| 2              | x                    | x                    |                         | 251    | DTPWC8F31-1-3-1-B                                                                                                                                                                                                                                                |
| 2              | x                    | x                    |                         | 269    | CL-G1829 G18C23-61-3-1-1-B*7                                                                                                                                                                                                                                     |
| 2              | x                    | x                    |                         | 270    | CL-G1901 G19C3H19-1-1-B-2-2-B*4                                                                                                                                                                                                                                  |
| 2              | x                    | x                    |                         | 279    | Tx130                                                                                                                                                                                                                                                            |
| 2              | x                    | x                    |                         | 281    | (B97-B-B/Do940y))-B-B-B-1-B-B                                                                                                                                                                                                                                    |
| 2              | x                    | x                    |                         | 282    | (Tx802-B-B-B/B104)-2-5-B1-1-B                                                                                                                                                                                                                                    |
| 2              | x                    | x                    |                         | 283    | (Tx802-B-B-B/B104)-3 CORNEOUS-10-B2-1-B-B                                                                                                                                                                                                                        |
| 2              | x                    | x                    |                         | 288    | LAMA2002-7-2-B                                                                                                                                                                                                                                                   |
| 2              | x                    | x                    |                         | 306    | M37W/ZM607#bF37sr-2-3sr-6-2-X]-8-2-X-1-BB-B-xP84c1 F27-4-3-3-B-1-B] F29-1-2-2 x [KILIMA ST94A]-30/MSV-03-101-08-B-B-1xP84c1 F27-4-1-4-B-3-B] F2-1-2-1-1-1-B (200-6 x GUAT189)(51-2-1)F1-B-xP84c1 F26-2-2-4-B-2-B] F102-1-3-1-2 x M37W/ZM607#bF37sr-2-3sr-6-2-X]- |
| 2              | x                    | x                    |                         | 307    | 8-2-X-1-BB-B-xP84c1 F27-4-3-3-B-1-B]-1-1-B (200-6 x GUAT189)(51-2-1)F1-B-xP84c1 F26-2-2-4-B-2-B] F102-2-2-2-2 x [KILIMA ST94A]-30/MSV-03-2-10-B                                                                                                                  |
| 2              | x                    | x                    |                         | 308    | 1-B-B-xP84c1 F27-4-1-6-B-5-B]-1-2-B P84c3xP8 P63C2HC5-1-3-1-B-2-1-B-# CML159 x P9 P62C3HC163-3-1-3-1-B-1-2-BBBBB-1-B-B CML156-2-                                                                                                                                 |
| 2              | x                    | x                    |                         | 315    | 1-1                                                                                                                                                                                                                                                              |
| 2              | x                    | x                    |                         | 320    | CML441                                                                                                                                                                                                                                                           |
| 3              | x                    | x                    |                         | 338    | CML - 45                                                                                                                                                                                                                                                         |

| Maturity Group                                              | pheno-typed in TL05A | pheno-typed in TL06A | used in assoc. analysis | Line # | Identification number                                                                                                                                                        |
|-------------------------------------------------------------|----------------------|----------------------|-------------------------|--------|------------------------------------------------------------------------------------------------------------------------------------------------------------------------------|
| 3                                                           | x                    | x                    |                         | 359    | CML - 200                                                                                                                                                                    |
| 3                                                           | x                    | x                    |                         | 378    | CML - 277                                                                                                                                                                    |
| 3                                                           | x                    | x                    |                         | 425    | CML - 453                                                                                                                                                                    |
| 3                                                           | x                    | x                    |                         | 434    | K-64 (JMR)                                                                                                                                                                   |
| 3                                                           | x                    | x                    |                         | 435    | MALAWI (JMR)                                                                                                                                                                 |
| 3                                                           | x                    | x                    |                         | 455    | MBR Et/MBR Bc C1 F58-1-1-3-B-B-B-Bx1760B B2 Bco x Comp.-B-2-1-1-1-B-B-B                                                                                                      |
| 3                                                           | x                    | x                    |                         | 456    | MBR Et/MBR Bc C1 F79-3-1-2-B-B-B-Bx1760B G2 Bco x Comp.-B-1-2-2-1-B-B-B<br>[KILIMA ST94A]-30/MSV-03-2-10-B-2-B-B-1xP84c1 F27-4-3-3-B-1-B] F18-2-2-2-1 x G16SeqC1F47-2-1-2-1- |
| 3                                                           | x                    | x                    |                         | 457    | BBBB-B-xP84c1 F26-2-2-6-B-3-B]-1-1-B                                                                                                                                         |
| <b>Not used in Association analysis; phenotyped in 2005</b> |                      |                      |                         |        |                                                                                                                                                                              |
| 1                                                           | x                    |                      |                         | 3      | CML - 81                                                                                                                                                                     |
| 1                                                           | x                    |                      |                         | 32     | CML - 245                                                                                                                                                                    |
| 1                                                           | x                    |                      |                         | 33     | CML - 295                                                                                                                                                                    |
| 1                                                           | x                    |                      |                         | 50     | CML - 421                                                                                                                                                                    |
| 1                                                           | x                    |                      |                         | 63     | 1999-D [NAW 5867 / P49-SR (52#)11 NAW5867] FS#                                                                                                                               |
| 1                                                           | x                    |                      |                         | 72     | DTPYC9-F142-3-2-1-2-B                                                                                                                                                        |
| 1                                                           | x                    |                      |                         | 82     | Tx110                                                                                                                                                                        |
| 1                                                           | x                    |                      |                         | 92     | ((CML 325/B104)x(CML285/B104))-2-2-B-B                                                                                                                                       |
| 1                                                           | x                    |                      |                         | 94     | ((Tx714/B14)x(NC258/B104))-1-1-B-B                                                                                                                                           |
| 1                                                           | x                    |                      |                         | 97     | (B104/NC300)-B-1-B1-B-B                                                                                                                                                      |
| 1                                                           | x                    |                      |                         | 98     | (CML 325/B104)-B-1-B-B-B-B                                                                                                                                                   |
| 1                                                           | x                    |                      |                         | 104    | ((Tx772 x Tx745) x Tx745)-9-1-B-B-B-B                                                                                                                                        |
| 1                                                           | x                    |                      |                         | 105    | AR16021:S08a02 Derived line (energy dense)-B-B-B-1-B-B-B                                                                                                                     |
| 1                                                           | x                    |                      |                         | 106    | LAMA2002-1-1-B                                                                                                                                                               |
| 1                                                           | x                    |                      |                         | 107    | LAMA2002-2-1-B                                                                                                                                                               |
| 1                                                           | x                    |                      |                         | 118    | Nei 402014-B-B-B                                                                                                                                                             |
| 2                                                           | x                    |                      |                         | 186    | CML - 224                                                                                                                                                                    |
| 2                                                           | x                    |                      |                         | 239    | CML - 472                                                                                                                                                                    |
| 2                                                           | x                    |                      |                         | 274    | CL-QRCWQ01                                                                                                                                                                   |
| 2                                                           | x                    |                      |                         | 276    | CL-QRCWQ50                                                                                                                                                                   |
| 2                                                           | x                    |                      |                         | 287    | (B104-1 x Tx714-B/B110 x FR2128-B)-2-2-B-B-B-B                                                                                                                               |
| 2                                                           | x                    |                      |                         | 295    | (90[SPMATC4/P500(SELY)]#-B-54-4-B-BxP45C6F46/CML329xMBR C1Am F6-1-2-2-B-B-B)-2-2-1-B-B-B                                                                                     |
| 2                                                           | x                    |                      |                         | 319    | CML-312                                                                                                                                                                      |
| 3                                                           | x                    |                      |                         | 323    | CML - 6                                                                                                                                                                      |
| 3                                                           | x                    |                      |                         | 327    | CML - 14                                                                                                                                                                     |
| 3                                                           | x                    |                      |                         | 336    | CML - 42                                                                                                                                                                     |
| 3                                                           | x                    |                      |                         | 339    | CML - 46                                                                                                                                                                     |
| 3                                                           | x                    |                      |                         | 344    | CML - 52                                                                                                                                                                     |
| 3                                                           | x                    |                      |                         | 345    | CML - 53                                                                                                                                                                     |
| 3                                                           | x                    |                      |                         | 346    | CML - 117                                                                                                                                                                    |
| 3                                                           | x                    |                      |                         | 347    | CML - 119                                                                                                                                                                    |

| <b>Maturity Group</b> | <b>pheno-typed in TL05A</b> | <b>pheno-typed in TL06A</b> | <b>used in assoc. analysis</b> | <b>Line #</b> | <b>Identification number</b>                                           |
|-----------------------|-----------------------------|-----------------------------|--------------------------------|---------------|------------------------------------------------------------------------|
| 3                     | x                           |                             |                                | 348           | CML - 120                                                              |
| 3                     | x                           |                             |                                | 367           | CML - 247                                                              |
| 3                     | x                           |                             |                                | 369           | CML - 251                                                              |
| 3                     | x                           |                             |                                | 375           | CML - 271                                                              |
| 3                     | x                           |                             |                                | 376           | CML - 272                                                              |
| 3                     | x                           |                             |                                | 385           | CML - 294                                                              |
| 3                     | x                           |                             |                                | 391           | CML - 339                                                              |
| 3                     | x                           |                             |                                | 396           | CML - 348                                                              |
| 3                     | x                           |                             |                                | 404           | CML - 392                                                              |
| 3                     | x                           |                             |                                | 407           | CML - 398                                                              |
| 3                     | x                           |                             |                                | 410           | CML - 403                                                              |
| 3                     | x                           |                             |                                | 411           | CML - 404                                                              |
| 3                     | x                           |                             |                                | 422           | CML - 444                                                              |
| 3                     | x                           |                             |                                | 424           | CML - 448                                                              |
| 3                     | x                           |                             |                                | 427           | CML - 464                                                              |
| 3                     | x                           |                             |                                | 444           | CL-RCW18 [(264x271)xSW/LIITA*MpHibC1SCB-F72-s4(MIRTS3-46-1)]-1-3-4-2-B |
