# Supplementary material for: Genetic association mapping identifies single nucleotide polymorphisms in genes that affect abscisic acid levels in maize floral tissues during drought
Source: PubMed Central journal article supplement — J Exp Bot. 2010 Nov 17;62(2):701–16. doi: 10.1093/jxb/erq308 (PMC3003815; doi:10.1093/jxb/erq308), 2010-11-17
Supplement: supp_erq308_00049361-file002.pdf [file supp_erq308_00049361-file002.pdf]

| SNP number* | SNP context sequence | aba syn | aba reg | stres s tol | cho met | cho reg | oth met | flw T reg | othr repro reg | oth reg | chrn mod | micr RNA | oth knwn |
|-------------|----------------------|---------|---------|-------------|---------|---------|---------|-----------|----------------|---------|----------|----------|----------|
| 32          | PZB02510.2           |         | x       |             |         |         |         |           |                |         |          |          |          |
| 33          | PZB02510.5           |         | x       |             |         |         |         |           |                |         |          |          |          |
| 34          | PZB01957.2           |         |         |             |         |         |         |           |                | x       |          |          |          |
| 35          | PZB01957.3           |         |         |             |         |         |         |           |                | x       |          |          |          |
| 36          | PZB01957.1           |         |         |             |         |         |         |           |                | x       |          |          |          |
| 37          | PZD00026.4           |         |         |             |         |         |         |           | x              |         |          |          |          |
| 38          | PZD00026.5           |         |         |             |         |         |         |           | x              |         |          |          |          |
| 39          | PZD00026.2           |         |         |             |         |         |         |           | x              |         |          |          |          |
| 40          | PZB02515.2           |         |         |             |         |         | x       |           |                |         |          |          |          |
| 41          | PZB02515.3           |         |         |             |         |         | x       |           |                |         |          |          |          |
| 42          | PZB02515.1           |         |         |             |         |         | x       |           |                |         |          |          |          |
| 43          | PZB02058.2           |         |         |             |         |         |         | x         |                |         |          |          |          |
| 44          | PZB02058.3           |         |         |             |         |         |         | x         |                |         |          |          |          |
| 45          | PZB01662.2           |         |         |             |         |         |         |           | x              |         |          |          |          |
| 46          | PZB01662.1           |         |         |             |         |         |         |           | x              |         |          |          |          |
| 47          | PZA03345.5           |         |         |             |         |         |         |           |                |         |          | x        |          |
| 48          | PZA03243.7           |         |         |             |         |         |         | x         |                |         |          |          |          |
| 49          | PZA03243.3           |         |         |             |         |         |         | x         |                |         |          |          |          |
| 50          | PZA03243.6           |         |         |             |         |         |         | x         |                |         |          |          |          |
| 51          | PZA03243.4           |         |         |             |         |         |         | x         |                |         |          |          |          |
| 52          | PZA03243.5           |         |         |             |         |         |         | x         |                |         |          |          |          |
| 53          | PZA03742.2           |         |         |             |         | x       |         |           |                |         |          |          |          |
| 54          | PZA03742.1           |         |         |             |         |         |         |           |                |         |          |          |          |
| 55          | PZB02517.1           |         |         |             |         |         | x       |           |                |         |          |          |          |
| 56          | PZD00010.3           |         |         |             |         |         |         |           | x              |         |          |          |          |
| 57          | PZA03673.2           |         |         |             |         |         |         |           |                |         | x        |          |          |
| 58          | PZA03673.1           |         |         |             |         |         |         |           |                |         | x        |          |          |
| 59          | PZA03672.1           |         |         |             |         |         |         |           |                |         | x        |          |          |
| 60          | PZB02095.3           |         |         |             |         |         |         | x         |                |         |          |          |          |
| 61          | PZB02095.2           |         |         |             |         |         |         | x         |                |         |          |          |          |
| 62          | PZA03168.1           |         |         |             |         |         |         |           |                | x       |          |          |          |
| 63          | PZA03168.2           |         |         |             |         |         |         |           |                | x       |          |          |          |
| 64          | PZA03746.5           |         |         |             |         |         |         |           |                | x       |          |          |          |
| 65          | PZA03746.1           |         |         |             |         |         |         |           |                | x       |          |          |          |
| 66          | PZA03746.4           |         |         |             |         |         |         |           |                | x       |          |          |          |
| 67          | PZB01273.2           |         |         |             | x       |         |         |           |                |         |          |          |          |
| 68          | PZA03561.1           |         |         | x           |         |         |         |           |                |         |          |          |          |
| 69          | PZA03561.4           |         |         | x           |         |         |         |           |                |         |          |          |          |
| 70          | PZA03561.2           |         |         | x           |         |         |         |           |                |         |          |          |          |
| 71          | PZA03240.1           |         |         |             |         |         | x       |           |                |         |          |          |          |
| 72          | PZA03240.2           |         |         |             |         |         | x       |           |                |         |          |          |          |

| SNP number* | SNP context sequence | aba syn | aba reg | stres s tol | cho met | cho reg | oth met | flw T reg | othr repro reg | oth reg | chrn mod | micr RNA | oth knwn |
|-------------|----------------------|---------|---------|-------------|---------|---------|---------|-----------|----------------|---------|----------|----------|----------|
| 73          | PZA03240.4           |         |         |             |         |         | x       |           |                |         |          |          |          |
| 74          | PZA03240.5           |         |         |             |         |         | x       |           |                |         |          |          |          |
| 75          | PZA03407.2           |         |         |             |         |         |         |           |                |         |          |          |          |
| 76          | PZA03407.5           |         |         |             |         |         | x       |           |                |         |          |          |          |
| 77          | PZA03407.3           |         |         |             | x       |         |         |           |                |         |          |          |          |
| 78          | PZA03407.4           |         |         |             | x       |         |         |           |                |         |          |          |          |
| 79          | PZB02176.1           | x       |         |             |         |         |         |           |                |         |          |          |          |
| 80          | PZB02176.2           | x       |         |             |         |         |         |           |                |         |          |          |          |
| 81          | PZB01067.2           |         |         |             | x       |         |         |           |                |         |          |          |          |
| 82          | PZB01067.1           |         |         |             | x       |         |         |           |                |         |          |          |          |
| 83          | PZA03394.1           |         |         |             |         |         |         |           |                |         |          |          |          |
| 84          | PZB01924.1           |         |         |             |         |         |         |           |                | x       |          |          |          |
| 85          | PZB00963.2           |         |         |             |         |         | x       |           |                |         |          |          |          |
| 86          | PZB00963.3           |         |         |             |         |         | x       |           |                |         |          |          |          |
| 87          | PZB00963.1           |         |         |             |         |         | x       |           |                |         |          |          |          |
| 88          | PZB00801.1           |         |         |             |         |         | x       |           |                |         |          |          |          |
| 89          | PZA03581.1           |         |         |             |         |         | x       |           |                |         |          |          |          |
| 90          | PZA03581.2           |         |         |             |         |         | x       |           |                |         |          |          |          |
| 91          | PZA03580.2           |         |         |             |         |         | x       |           |                |         |          |          |          |
| 92          | PZA03580.4           |         |         |             |         |         | x       |           |                |         |          |          |          |
| 93          | PZA03580.5           |         |         |             |         |         | x       |           |                |         |          |          |          |
| 94          | PZA03540.1           |         |         |             |         |         |         |           |                |         |          |          | x        |
| 95          | PZA03532.2           |         |         | x           |         |         |         |           |                |         |          |          |          |
| 96          | PZA03531.1           |         |         | x           |         |         |         |           |                |         |          |          |          |
| 97          | PZB00454.6           |         |         |             |         |         |         | x         |                |         |          |          |          |
| 98          | PZD00053.5           |         |         |             |         |         |         |           | x              |         |          |          |          |
| 99          | PZD00053.4           |         |         |             |         |         |         |           | x              |         |          |          |          |
| 100         | PZA03427.1           |         |         |             |         |         |         |           |                | x       |          |          |          |
| 101         | PZA03427.2           |         |         |             |         |         |         |           |                | x       |          |          |          |
| 102         | PZA03685.1           |         |         |             |         |         |         |           |                |         | x        |          |          |
| 103         | PZA03686.1           |         |         |             |         |         |         |           |                |         | x        |          |          |
| 104         | PZB01156.2           |         |         |             |         |         | x       |           |                |         |          |          |          |
| 105         | PZB01156.3           |         |         |             |         |         | x       |           |                |         |          |          |          |
| 106         | PZB01077.7           |         |         |             | x       |         |         |           |                |         |          |          |          |
| 107         | PZB01077.3           |         |         |             | x       |         |         |           |                |         |          |          |          |
| 108         | PZB00991.1           |         |         |             |         |         | x       |           |                |         |          |          |          |
| 109         | PZB00728.1           |         |         |             |         |         | x       |           |                |         |          |          |          |
| 110         | PZB00728.2           |         |         |             |         |         | x       |           |                |         |          |          |          |
| 111         | PZA03194.1           |         |         |             |         |         |         |           |                | x       |          |          |          |
| 112         | PZA03193.1           |         |         |             |         |         |         |           |                | x       |          |          |          |
| 113         | PZA03265.3           |         |         |             |         |         |         |           |                | x       |          |          |          |

| SNP number* | SNP context sequence | aba syn | aba reg | stres s tol | cho met | cho reg | oth met | flw T reg | othr repro reg | oth reg | chrn mod | micr RNA | oth knwn |
|-------------|----------------------|---------|---------|-------------|---------|---------|---------|-----------|----------------|---------|----------|----------|----------|
| 114         | PZA03265.4           |         |         |             |         |         |         |           |                | x       |          |          |          |
| 115         | PZB02171.1           |         | x       |             |         |         |         |           |                |         |          |          |          |
| 116         | PZB02171.2           |         | x       |             |         |         |         |           |                |         |          |          |          |
| 117         | PZA03545.1           |         | x       |             |         |         |         |           |                |         |          |          |          |
| 118         | PZA03741.1           |         |         |             |         |         |         |           |                | x       |          |          |          |
| 119         | PZA03632.3           |         |         |             |         |         |         |           |                |         | x        |          |          |
| 120         | PZA03632.1           |         |         |             |         |         |         |           |                |         | x        |          |          |
| 121         | PZA03632.2           |         |         |             |         |         |         |           |                |         | x        |          |          |
| 122         | PZA03631.1           |         |         |             |         |         |         |           |                |         | x        |          |          |
| 123         | PZA03631.2           |         |         |             |         |         |         |           |                |         | x        |          |          |
| 124         | PZA03630.1           |         |         |             |         |         |         |           |                |         | x        |          |          |
| 125         | PZA03630.2           |         |         |             |         |         |         |           |                |         | x        |          |          |
| 126         | PZA03443.1           |         |         |             |         |         |         |           |                |         |          |          |          |
| 127         | PZB01979.2           |         |         |             |         |         |         |           |                | x       |          |          |          |
| 128         | PZB01979.3           |         |         |             |         |         |         |           |                | x       |          |          |          |
| 129         | PZB01647.2           |         |         |             |         |         |         |           |                | x       |          |          |          |
| 130         | PZB01647.1           |         |         |             |         |         |         |           |                |         |          |          |          |
| 131         | PZB00011.1           |         |         |             |         |         |         | x         |                |         |          |          |          |
| 132         | PZB00116.1           |         |         |             |         |         |         | x         |                |         |          |          |          |
| 133         | PZB00011.6           |         |         |             |         |         |         | x         |                |         |          |          |          |
| 134         | PZB00116.2           |         |         |             |         |         |         | x         |                |         |          |          |          |
| 135         | PZB02144.4           |         |         |             | x       |         |         |           |                |         |          |          |          |
| 136         | PZB02144.5           |         |         |             | x       |         |         |           |                |         |          |          |          |
| 137         | PZB00148.3           |         |         |             |         |         |         | x         |                |         |          |          |          |
| 138         | PZB00237.1           |         |         |             |         |         |         | x         |                |         |          |          |          |
| 139         | PZA03301.5           |         |         |             |         |         |         |           |                |         |          | ?        |          |
| 140         | PZA03666.3           |         |         |             |         |         |         |           |                |         | x        |          |          |
| 141         | PZA03665.2           |         |         |             |         |         |         |           |                |         | x        |          |          |
| 142         | PZA03664.1           |         |         |             |         |         |         |           |                |         | x        |          |          |
| 143         | PME.1                |         |         |             |         |         |         |           |                |         |          |          |          |
| 144         | PZA03214.2           |         |         |             |         |         |         |           |                | x       |          |          |          |
| 145         | PZA03214.1           |         |         |             |         |         |         |           |                | x       |          |          |          |
| 146         | PZA03404.1           |         |         |             |         |         |         |           |                |         |          |          |          |
| 147         | PZA03578.1           |         |         |             |         |         |         |           |                |         | x        |          |          |
| 148         | PZA03387.1           |         |         |             |         |         |         |           |                |         |          |          |          |
| 149         | PZA03387.2           |         |         |             |         |         |         |           |                |         |          |          |          |
| 150         | PZB02476.1           |         |         |             |         |         |         | x         |                |         |          |          |          |
| 151         | PZB02476.2           |         |         |             |         |         |         | x         |                |         |          |          |          |
| 152         | PZA03392.2           |         |         |             |         |         |         | x         |                |         |          |          |          |
| 153         | PZA03392.1           |         |         |             |         |         |         | x         |                |         |          |          |          |
| 154         | PZD00066.5           |         |         |             |         |         |         |           |                | x       |          |          |          |

| SNP number* | SNP context sequence | aba syn | aba reg | stres s tol | cho met | cho reg | oth met | flw T reg | othr repro reg | oth reg | chrn mod | micr RNA | oth knwn |
|-------------|----------------------|---------|---------|-------------|---------|---------|---------|-----------|----------------|---------|----------|----------|----------|
| 155         | PZB01725.2           |         |         |             | x       |         |         |           |                |         |          |          |          |
| 156         | PZB01725.1           |         |         |             | x       |         |         |           |                |         |          |          |          |
| 157         | PZB01728.5           |         |         |             | x       |         |         |           |                |         |          |          |          |
| 158         | PZB01728.6           |         |         |             | x       |         |         |           |                |         |          |          |          |
| 159         | PZB01728.7           |         |         |             | x       |         |         |           |                |         |          |          |          |
| 160         | PZB00083.1           |         |         |             |         |         |         | x         |                |         |          |          |          |
| 161         | PZB00083.3           |         |         |             |         |         |         | x         |                |         |          |          |          |
| 162         | PZB00895.4           |         |         |             |         |         |         | x         |                |         |          |          |          |
| 163         | PZB00895.3           |         |         |             |         |         |         | x         |                |         |          |          |          |
| 164         | PZB00895.2           |         |         |             |         |         |         | x         |                |         |          |          |          |
| 165         | PZB00001.1           |         |         |             |         |         |         | x         |                |         |          |          |          |
| 166         | PZB00063.6           |         |         |             |         |         |         | x         |                |         |          |          |          |
| 167         | PZB02091.2           |         |         |             |         |         |         | x         |                |         |          |          |          |
| 168         | PZB00063.5           |         |         |             |         |         |         | x         |                |         |          |          |          |
| 169         | PZB02091.1           |         |         |             |         |         |         | x         |                |         |          |          |          |
| 170         | PZB01427.4           |         |         |             |         |         |         |           | x              |         |          |          |          |
| 171         | PZB01427.5           |         |         |             |         |         |         |           | x              |         |          |          |          |
| 172         | PZB00087.3           |         |         |             |         |         |         | x         |                |         |          |          |          |
| 173         | PZB00087.1           |         |         |             |         |         |         | x         |                |         |          |          |          |
| 174         | PZB00087.2           |         |         |             |         |         |         | x         |                |         |          |          |          |
| 175         | PZB00085.1           |         |         |             |         |         |         | x         |                |         |          |          |          |
| 176         | PZB00178.3           |         |         |             |         |         |         | x         |                |         |          |          |          |
| 177         | PZB00178.2           |         |         |             |         |         |         | x         |                |         |          |          |          |
| 178         | PZB00178.1           |         |         |             |         |         |         | x         |                |         |          |          |          |
| 179         | PZD00039.4           |         |         |             |         |         |         |           | x              |         |          |          |          |
| 180         | PZD00039.2           |         |         |             |         |         |         |           | x              |         |          |          |          |
| 181         | PZD00039.3           |         |         |             |         |         |         |           | x              |         |          |          |          |
| 182         | PZB01403.2           | x       |         |             |         |         |         |           |                |         |          |          |          |
| 183         | PZB01403.5           | x       |         |             |         |         |         |           |                |         |          |          |          |
| 184         | PZB01403.1           | x       |         |             |         |         |         |           |                |         |          |          |          |
| 185         | PZB01403.3           | x       |         |             |         |         |         |           |                |         |          |          |          |
| 186         | PZB01403.4           | x       |         |             |         |         |         |           |                |         |          |          |          |
| 187         | PZB01400.1           | x       |         |             |         |         |         |           |                |         |          |          |          |
| 188         | PZB01400.5           | x       |         |             |         |         |         |           |                |         |          |          |          |
| 189         | PZB01400.3           | x       |         |             |         |         |         |           |                |         |          |          |          |
| 190         | PZB01400.4           | x       |         |             |         |         |         |           |                |         |          |          |          |
| 191         | PZB01400.2           | x       |         |             |         |         |         |           |                |         |          |          |          |
| 192         | PZB01394.1           | x       |         |             |         |         |         |           |                |         |          |          |          |
| 193         | PZB01394.4           | x       |         |             |         |         |         |           |                |         |          |          |          |
| 194         | PZB01394.2           | x       |         |             |         |         |         |           |                |         |          |          |          |
| 195         | PZB00119.1           |         |         |             |         |         | x       |           |                |         |          |          |          |

| SNP number* | SNP context sequence | aba syn | aba reg | stres s tol | cho met | cho reg | oth met | flw T reg | othr repro reg | oth reg | chrn mod | micr RNA | oth knwn |
|-------------|----------------------|---------|---------|-------------|---------|---------|---------|-----------|----------------|---------|----------|----------|----------|
| 196         | PZB00119.2           |         |         |             |         |         | x       |           |                |         |          |          |          |
| 197         | PZB00119.3           |         |         |             |         |         | x       |           |                |         |          |          |          |
| 198         | PZB02440.1           |         |         |             |         |         | x       |           |                |         |          |          |          |
| 199         | PZB02513.3           |         |         |             |         |         | x       |           |                |         |          |          |          |
| 200         | PZB02513.1           |         |         |             |         |         | x       |           |                |         |          |          |          |
| 201         | PZB02513.4           |         |         |             |         |         | x       |           |                |         |          |          |          |
| 202         | PZA03305.2           |         |         |             |         |         |         |           |                |         |          | ?        |          |
| 203         | PZA03111.2           |         |         |             |         |         |         |           |                | x       |          |          |          |
| 204         | PZB01226.1           |         |         |             |         |         |         |           | x              |         |          |          |          |
| 205         | PZA03556.2           |         |         |             |         |         |         |           |                |         |          |          |          |
| 206         | PZA03556.3           |         |         |             |         |         |         |           |                |         |          |          |          |
| 207         | PZA03556.1           |         |         |             |         |         |         |           |                |         |          |          |          |
| 208         | PZB02502.5           |         | x       |             |         |         |         |           |                |         |          |          |          |
| 209         | PZB02502.2           |         | x       |             |         |         |         |           |                |         |          |          |          |
| 210         | PZB02502.1           |         | x       |             |         |         |         |           |                |         |          |          |          |
| 211         | PZB01937.1           |         |         |             |         |         |         |           |                |         | x        |          |          |
| 212         | PZB01937.2           |         |         |             |         |         |         |           |                |         | x        |          |          |
| 213         | PZB01937.3           |         |         |             |         |         |         |           |                |         | x        |          |          |
| 214         | PZA03310.2           |         |         |             |         |         |         |           |                |         |          | ?        |          |
| 215         | PZA03423.2           |         |         |             |         |         |         |           |                |         |          |          |          |
| 216         | PZB02366.2           |         |         |             |         |         | x       |           |                |         |          |          |          |
| 217         | PZB02366.1           |         |         |             |         |         | x       |           |                |         |          |          |          |
| 218         | PZB02366.3           |         |         |             |         |         | x       |           |                |         |          |          |          |
| 219         | PZB02145.4           |         |         |             | x       |         |         |           |                |         |          |          |          |
| 220         | PZB02145.2           |         |         |             | x       |         |         |           |                |         |          |          |          |
| 221         | PZB02145.1           |         |         |             | x       |         |         |           |                |         |          |          |          |
| 222         | PZB01233.5           |         |         |             |         |         |         |           |                | x       |          |          |          |
| 223         | PZB01233.6           |         |         |             |         |         |         |           |                | x       |          |          |          |
| 224         | PZB02518.1           |         |         |             |         |         | x       |           |                |         |          |          |          |
| 225         | PZA03747.7           |         |         |             |         |         |         |           |                |         |          |          |          |
| 226         | PZA03747.4           |         |         |             |         |         |         |           |                |         |          |          |          |
| 227         | PZA03747.2           |         |         |             |         |         |         |           |                |         |          |          |          |
| 228         | PZA03747.1           |         |         |             |         |         |         |           |                |         |          |          |          |
| 229         | PZA03748.2           |         |         |             |         |         |         |           |                |         |          |          |          |
| 230         | PZA03748.3           |         |         |             |         |         |         |           |                |         |          |          |          |
| 231         | PZA03748.4           |         |         |             |         |         |         |           |                |         |          |          |          |
| 232         | PZA03748.1           |         |         |             |         |         |         |           |                |         |          |          |          |
| 233         | PZA03701.1           |         |         |             |         |         |         |           |                |         | x        |          |          |
| 234         | PZA03700.3           |         |         |             |         |         |         |           |                |         | x        |          |          |
| 235         | PZA03700.2           |         |         |             |         |         |         |           |                |         | x        |          |          |
| 236         | PZA03699.1           |         |         |             |         |         |         |           |                |         | x        |          |          |

| SNP number* | SNP context sequence | aba syn | aba reg | stres s tol | cho met | cho reg | oth met | flw T reg | othr repro reg | oth reg | chrn mod | micr RNA | oth knwn |
|-------------|----------------------|---------|---------|-------------|---------|---------|---------|-----------|----------------|---------|----------|----------|----------|
| 237         | PZB00517.4           |         |         |             |         |         |         | x         |                |         |          |          |          |
| 238         | PZB00517.2           |         |         |             |         |         |         | x         |                |         |          |          |          |
| 239         | PZB00901.7           |         |         |             |         |         |         | x         |                |         |          |          |          |
| 240         | PZB00901.4           |         |         |             |         |         |         | x         |                |         |          |          |          |
| 241         | PZB00901.6           |         |         |             |         |         |         | x         |                |         |          |          |          |
| 242         | PZB00901.5           |         |         |             |         |         |         | x         |                |         |          |          |          |
| 243         | PZA03336.3           |         |         |             |         |         |         |           |                |         |          | x        |          |
| 244         | PZB00219.1           |         |         |             |         |         |         | x         |                |         |          |          |          |
| 245         | PZA03559.2           |         |         |             |         |         |         |           |                | x       |          |          |          |
| 246         | PZA03559.1           |         |         |             |         |         |         |           |                | x       |          |          |          |
| 247         | PZA03442.1           |         |         |             |         |         |         |           |                | x       |          |          |          |
| 248         | PZB01930.1           |         |         |             |         |         |         |           |                | x       |          |          |          |
| 249         | PZA03415.1           |         | ?       |             |         |         |         |           |                |         |          |          |          |
| 250         | PZB02020.3           |         |         | x           |         |         |         |           |                |         |          |          |          |
| 251         | PZB02017.1           |         |         | x           |         |         |         |           |                |         |          |          |          |
| 252         | PZB02017.2           |         |         | x           |         |         |         |           |                |         |          |          |          |
| 253         | PZB02017.4           |         |         | x           |         |         |         |           |                |         |          |          |          |
| 254         | PZB02017.3           |         |         | x           |         |         |         |           |                |         |          |          |          |
| 255         | PZA03635.1           |         |         |             |         |         |         |           |                |         | x        |          |          |
| 256         | PZA03634.2           |         |         |             |         |         |         |           |                |         | x        |          |          |
| 257         | PZA03633.1           |         |         |             |         |         |         |           |                |         | x        |          |          |
| 258         | PZA03350.1           |         |         |             | x       |         |         |           |                |         |          |          |          |
| 259         | PZB02167.2           |         |         |             | x       |         |         |           |                |         |          |          |          |
| 260         | PZB02167.1           |         |         |             | x       |         |         |           |                |         |          |          |          |
| 261         | PZB02194.1           |         |         |             | x       |         |         |           |                |         |          |          |          |
| 262         | PZA03642.1           |         |         |             |         |         |         |           |                |         | x        |          |          |
| 263         | PZB02035.2           |         |         |             |         |         |         | x         |                |         |          |          |          |
| 264         | PZB02035.3           |         |         |             |         |         |         | x         |                |         |          |          |          |
| 265         | PZB02035.4           |         |         |             |         |         |         | x         |                |         |          |          |          |
| 266         | PZB02035.1           |         |         |             |         |         |         | x         |                |         |          |          |          |
| 267         | PZA03568.2           |         |         |             |         |         | x       |           |                |         |          |          |          |
| 268         | PZA03568.3           |         |         |             |         |         | x       |           |                |         |          |          |          |
| 269         | PZA03567.1           |         |         |             |         |         | x       |           |                |         |          |          |          |
| 270         | PZA03121.2           |         |         |             |         |         |         |           |                | x       |          |          |          |
| 271         | PZA03319.1           |         |         |             |         |         |         |           |                |         |          | x        |          |
| 272         | PZB02523.1           |         |         |             |         |         |         |           |                |         | x        |          |          |
| 273         | PZB00257.1           |         |         |             |         |         | x       |           |                |         |          |          |          |
| 274         | PZA03328.6           |         |         |             |         |         |         |           |                |         |          | x        |          |
| 275         | PZA03328.7           |         |         |             |         |         |         |           |                |         |          | x        |          |
| 276         | PZB01230.5           |         |         |             |         |         |         |           | x              |         |          |          |          |
| 277         | PZA03233.2           |         |         |             |         |         | x       |           |                |         |          |          |          |

| SNP number* | SNP context sequence | aba syn | aba reg | stres s tol | cho met | cho reg | oth met | flw T reg | othr repro reg | oth reg | chrn mod | micr RNA | oth knwn |
|-------------|----------------------|---------|---------|-------------|---------|---------|---------|-----------|----------------|---------|----------|----------|----------|
| 278         | PZA03233.1           |         |         |             |         |         | x       |           |                |         |          |          |          |
| 279         | PZB01047.1           |         |         |             | x       |         |         |           |                |         |          |          |          |
| 280         | PZB00183.2           |         |         |             |         |         |         | x         |                |         |          |          |          |
| 281         | PZB01370.1           | x       |         |             |         |         |         |           |                |         |          |          |          |
| 282         | PZB01370.2           | x       |         |             |         |         |         |           |                |         |          |          |          |
| 283         | PZA03629.1           |         |         |             |         |         |         |           |                |         | x        |          |          |
| 284         | PZA03629.2           |         |         |             |         |         |         |           |                |         | x        |          |          |
| 285         | PZA03627.1           |         |         |             |         |         |         |           |                |         | x        |          |          |
| 286         | PZA03627.3           |         |         |             |         |         |         |           |                |         | x        |          |          |
| 287         | PZB02209.1           |         |         |             | x       |         |         |           |                |         |          |          |          |
| 288         | PZB02209.2           |         |         |             | x       |         |         |           |                |         |          |          |          |
| 289         | PZB02209.3           |         |         |             | x       |         |         |           |                |         |          |          |          |
| 290         | PZA03756.1           |         |         |             |         |         |         |           |                |         | x        |          |          |
| 291         | PZA03756.2           |         |         |             |         |         |         |           |                |         | x        |          |          |
| 292         | PZB01325.1           |         |         |             | x       |         |         |           |                |         |          |          |          |
| 293         | PZA03410.1           |         |         |             |         |         | x       |           |                |         |          |          |          |
| 294         | PZA03358.1           |         |         |             |         |         |         |           |                |         |          |          |          |
| 295         | PZA03358.2           |         |         |             |         |         |         |           |                |         |          |          |          |
| 296         | PZA03358.3           |         |         |             |         |         |         |           |                |         |          |          |          |
| 297         | PZA03358.4           |         |         |             |         |         |         |           |                |         |          |          |          |
| 298         | PZB02521.1           |         |         |             |         |         |         |           |                |         | x        |          |          |
| 299         | PZB02521.2           |         |         |             |         |         |         |           |                |         | x        |          |          |
| 300         | PZB01969.3           | x       |         |             |         |         |         |           |                |         |          |          |          |
| 301         | PZB01969.1           | x       |         |             |         |         |         |           |                |         |          |          |          |
| 302         | PZB01969.4           | x       |         |             |         |         |         |           |                |         |          |          |          |
| 303         | PZB01969.2           | x       |         |             |         |         |         |           |                |         |          |          |          |
| 304         | PZB01487.1           |         |         |             |         |         |         |           |                |         | x        |          |          |
| 305         | PZB01500.1           |         |         |             |         |         |         |           |                |         | x        |          |          |
| 306         | PZB01487.2           |         |         |             |         |         |         |           |                |         | x        |          |          |
| 307         | PZB02511.1           |         |         |             |         |         | x       |           |                |         |          |          |          |
| 308         | PZB01285.2           |         |         |             |         | x       |         |           |                |         |          |          |          |
| 309         | PZB01285.1           |         |         |             |         | x       |         |           |                |         |          |          |          |
| 310         | PZA03211.4           |         |         |             |         |         | x       |           |                |         |          |          |          |
| 311         | PZA03539.1           |         |         |             |         |         |         |           |                |         | x        |          |          |
| 312         | PZA03390.1           |         |         |             |         |         |         |           |                |         |          |          |          |
| 313         | PZB02119.1           |         |         |             |         |         |         | x         |                |         |          |          |          |
| 314         | PZB02235.2           |         |         |             |         |         |         | x         |                |         |          |          |          |
| 315         | PZB02235.5           |         |         |             |         |         |         | x         |                |         |          |          |          |
| 316         | PZB02235.3           |         |         |             |         |         |         | x         |                |         |          |          |          |
| 317         | PZA03692.1           |         |         |             |         |         |         |           |                |         | x        |          |          |
| 318         | PZA03692.2           |         |         |             |         |         |         |           |                |         | x        |          |          |





| SNP number* | SNP context sequence | aba syn | aba reg | stres s tol | cho met | cho reg | oth met | flw T reg | othr repro reg | oth reg | chrn mod | micr RNA | oth knwn |
|-------------|----------------------|---------|---------|-------------|---------|---------|---------|-----------|----------------|---------|----------|----------|----------|
| 360         | PZA03438.1           |         |         |             |         |         |         |           |                | x       |          |          |          |
| 361         | PZA03165.1           |         |         |             |         |         |         |           |                | x       |          |          |          |
| 362         | PZB02007.2           |         | x       |             |         |         |         |           |                |         |          |          |          |
| 363         | PZB02007.1           |         | x       |             |         |         |         |           |                |         |          |          |          |
| 364         | PZA03602.1           |         |         |             |         |         |         |           |                |         |          |          |          |
| 365         | PZA03602.2           |         |         |             |         |         |         |           |                |         |          |          |          |
| 366         | PZA03601.3           |         |         |             |         |         |         |           |                |         | x        |          |          |
| 367         | PZA03601.1           |         |         |             |         |         |         |           |                |         | x        |          |          |
| 368         | PZA03600.1           |         |         |             |         |         |         |           |                |         |          |          |          |
| 369         | PZB01234.5           |         |         |             |         |         |         |           | x              |         |          |          |          |
| 370         | PZB01013.3           |         |         |             |         |         | x       |           |                |         |          |          |          |
| 371         | PZB01013.1           |         |         |             |         |         | x       |           |                |         |          |          |          |
| 372         | PZB01013.2           |         |         |             |         |         | x       |           |                |         |          |          |          |
| 373         | PZB01013.4           |         |         |             |         |         | x       |           |                |         |          |          |          |
| 374         | PZD00022.5           |         |         |             |         |         |         |           | x              |         |          |          |          |
| 375         | PZD00022.6           |         |         |             |         |         |         |           | x              |         |          |          |          |
| 376         | PZD00022.7           |         |         |             |         |         |         |           | x              |         |          |          |          |
| 377         | PZA03576.4           |         |         |             |         |         |         |           |                |         | x        |          |          |
| 378         | PZA03576.1           |         |         |             |         |         |         |           |                |         | x        |          |          |
| 379         | PZA03576.3           |         |         |             |         |         |         |           |                |         | x        |          |          |
| 380         | PZA03577.2           |         |         |             |         |         |         |           |                |         | x        |          |          |
| 381         | PZA03577.1           |         |         |             |         |         |         |           |                |         | x        |          |          |
| 382         | PZA03321.4           |         |         |             |         |         |         |           |                |         |          | x        |          |
| 383         | PZD00038.3           |         |         |             |         |         |         |           | x              |         |          |          |          |
| 384         | PZD00038.1           |         |         |             |         |         |         |           | x              |         |          |          |          |
| 385         | PZA03527.3           |         |         |             |         |         |         |           |                | x       |          |          |          |
| 386         | PZA03527.2           |         |         |             |         |         |         |           |                | x       |          |          |          |
| 387         | PZA03527.1           |         |         |             |         |         |         |           |                | x       |          |          |          |
| 388         | PZB01947.1           |         |         |             |         |         |         |           |                | x       |          |          |          |
| 389         | PZA03525.1           |         |         |             |         |         |         |           |                | x       |          |          |          |
| 390         | PZB01940.1           |         |         |             |         |         |         |           |                | x       |          |          |          |
| 391         | PZA03309.1           |         |         |             |         |         |         |           |                |         |          | ?        |          |
| 392         | PZA03185.1           |         |         |             |         |         |         |           |                | x       |          |          |          |
| 393         | PZB01964.4           |         | x       |             |         |         |         |           |                |         |          |          |          |
| 394         | PZB01964.3           |         | x       |             |         |         |         |           |                |         |          |          |          |
| 395         | PZB01964.5           |         | x       |             |         |         |         |           |                |         |          |          |          |
| 396         | PZB01964.1           |         | x       |             |         |         |         |           |                |         |          |          |          |
| 397         | PZB01864.2           |         | x       |             |         |         |         |           |                |         |          |          |          |
| 398         | PZA03119.3           |         |         |             |         |         |         |           |                | x       |          |          |          |
| 399         | PZA03440.1           |         |         |             |         |         | x       |           |                |         |          |          |          |
| 400         | PZA03440.2           |         |         |             |         |         | x       |           |                |         |          |          |          |



| SNP number* | SNP context sequence | aba syn | aba reg | stres s tol | cho met | cho reg | oth met | flw T reg | othr repro reg | oth reg | chrn mod | micr RNA | oth knwn |
|-------------|----------------------|---------|---------|-------------|---------|---------|---------|-----------|----------------|---------|----------|----------|----------|
| 442         | PZB01683.3           |         |         |             |         |         |         |           |                |         |          |          |          |
| 443         | PZB01463.7           |         |         |             |         |         |         |           | x              |         |          |          |          |
| 444         | PZB01463.6           |         |         |             |         |         |         |           | x              |         |          |          |          |
| 445         | PZB02188.2           |         |         |             |         | x       |         |           |                |         |          |          |          |
| 446         | PZB02179.2           |         |         |             |         | x       |         |           |                |         |          |          |          |
| 447         | PZB02179.5           |         |         |             |         | x       |         |           |                |         |          |          |          |
| 448         | PZB01887.2           |         |         |             | x       |         |         |           |                |         |          |          |          |
| 449         | PZB01892.1           | x       |         |             |         |         |         |           |                |         |          |          |          |
| 450         | PZB01856.4           |         | x       |             |         |         |         |           |                |         |          |          |          |
| 451         | PZB01856.1           |         |         | x           |         |         |         |           |                |         |          |          |          |
| 452         | PZB01856.2           |         |         | x           |         |         |         |           |                |         |          |          |          |
| 453         | PZB01107.5           |         |         |             | x       |         |         |           |                |         |          |          |          |
| 454         | PZB01107.2           |         |         |             | x       |         |         |           |                |         |          |          |          |
| 455         | PZB01107.6           |         |         |             | x       |         |         |           |                |         |          |          |          |
| 456         | PZB01107.8           |         |         |             | x       |         |         |           |                |         |          |          |          |
| 457         | PZB01107.7           |         |         |             | x       |         |         |           |                |         |          |          |          |
| 458         | PZB01933.1           |         |         |             |         |         |         |           | x              |         |          |          |          |
| 459         | PZB01933.2           |         |         |             |         |         |         |           | x              |         |          |          |          |
| 460         | PZD00040.2           |         |         |             |         |         |         |           | x              |         |          |          |          |
| 461         | PZD00040.3           |         |         |             |         |         |         |           | x              |         |          |          |          |
| 462         | PZD00027.5           |         |         |             |         |         |         |           | x              |         |          |          |          |
| 463         | PZD00027.1           |         |         |             |         |         |         |           | x              |         |          |          |          |
| 464         | PZD00027.4           |         |         |             |         |         |         |           | x              |         |          |          |          |
| 465         | PZD00027.3           |         |         |             |         |         |         |           | x              |         |          |          |          |
| 466         | PZB01473.3           |         |         |             |         |         |         |           |                | x       |          |          |          |
| 467         | PZB01919.2           |         |         |             |         |         |         |           |                | x       |          |          |          |
| 468         | PZB01919.1           |         |         |             |         |         |         |           |                | x       |          |          |          |
| 469         | PZA03359.1           |         |         |             |         |         |         |           |                | x       |          |          |          |
| 470         | PZA03359.2           |         |         |             |         |         |         |           |                | x       |          |          |          |
| 471         | PZA03359.3           |         |         |             |         |         |         |           |                |         |          |          |          |
| 472         | PZA03733.2           |         |         |             |         |         |         |           |                |         |          |          |          |
| 473         | PZA03733.1           |         |         |             |         |         |         |           |                |         |          |          |          |
| 474         | PZA03734.2           |         |         |             |         |         |         |           |                |         |          |          |          |
| 475         | PZA03734.3           |         |         |             |         |         | x       |           |                |         |          |          |          |
| 476         | PZA03735.2           |         |         |             |         |         | x       |           |                |         |          |          |          |
| 477         | PZA03735.1           |         |         |             |         |         |         |           |                |         |          |          |          |
| 478         | PZD00078.1           |         |         |             |         |         |         |           | x              |         |          |          |          |
| 479         | PZA03191.3           |         |         |             |         |         |         |           |                | x       |          |          |          |
| 480         | PZA03649.1           |         |         |             |         |         |         |           |                |         | x        |          |          |
| 481         | PZA03648.2           |         |         |             |         |         |         |           |                |         | x        |          |          |
| 482         | PZA03648.3           |         |         |             |         |         |         |           |                |         | x        |          |          |

| SNP number* | SNP context sequence | aba syn | aba reg | stres s tol | cho met | cho reg | oth met | flw T reg | othr repro reg | oth reg | chrn mod | micr RNA | oth knwn |
|-------------|----------------------|---------|---------|-------------|---------|---------|---------|-----------|----------------|---------|----------|----------|----------|
| 483         | PZA03648.1           |         |         |             |         |         |         |           |                |         | x        |          |          |
| 484         | PZA03647.3           |         |         |             |         |         |         |           |                |         | x        |          |          |
| 485         | PZA03647.1           |         |         |             |         |         |         |           |                |         | x        |          |          |
| 486         | PZB01052.4           |         |         |             | x       |         |         |           |                |         |          |          |          |
| 487         | PZA03743.1           |         |         |             |         |         |         |           |                |         |          |          |          |
| 488         | PZA03744.2           |         |         |             |         |         |         |           |                |         |          |          |          |
| 489         | PZA03744.4           |         |         |             |         |         |         |           |                |         |          |          |          |
| 490         | PZB01223.1           |         |         |             |         |         |         |           | x              |         |          |          |          |
| 491         | PZA03255.1           |         |         |             |         |         | x       |           |                |         |          |          |          |
| 492         | PZA03255.3           |         |         |             |         |         | x       |           |                |         |          |          |          |
| 493         | PZA03255.4           |         |         |             |         |         | x       |           |                |         |          |          |          |
| 494         | PZB02516.2           |         |         |             |         |         | x       |           |                |         |          |          |          |
| 495         | PZB02516.3           |         |         |             |         |         | x       |           |                |         |          |          |          |
| 496         | PZB02516.1           |         |         |             |         |         | x       |           |                |         |          |          |          |
| 497         | PZB01109.1           |         |         |             |         |         |         |           | x              |         |          |          |          |
| 498         | PZD00004.3           |         |         |             |         |         |         |           | x              |         |          |          |          |
| 499         | PZA03224.1           |         |         |             |         |         |         |           |                | x       |          |          |          |
| 500         | PZA03154.2           |         |         |             |         |         |         |           |                | x       |          |          |          |
| 501         | PZB01449.2           |         |         |             |         |         |         | x         |                |         |          |          |          |
| 502         | PZB01449.3           |         |         |             |         |         |         | x         |                |         |          |          |          |
| 503         | PZA03346.6           |         |         |             |         |         |         |           |                |         |          | x        |          |
| 504         | PZA03346.5           |         |         |             |         |         |         |           |                |         |          | x        |          |
| 505         | PZA03553.1           |         |         |             |         |         |         |           |                |         |          |          |          |
| 506         | PZB01457.1           |         |         | x           |         |         |         |           |                |         |          |          |          |
| 507         | PZB01457.3           |         |         | x           |         |         |         |           |                |         |          |          |          |
| 508         | PZB02076.3           |         |         |             |         |         |         | x         |                |         |          |          |          |
| 509         | PZB02076.1           |         |         |             |         |         |         | x         |                |         |          |          |          |
| 510         | PZA03360.1           |         |         |             |         |         |         |           |                |         |          |          |          |
| 511         | PZA03391.1           |         |         |             |         |         |         |           |                |         |          |          |          |
| 512         | PZA03391.2           |         |         |             |         |         |         |           |                |         |          |          |          |
| 513         | PZA03391.3           |         |         |             |         |         |         |           |                | x       |          |          |          |
| 514         | PZB00954.1           |         |         |             | x       |         |         |           |                |         |          |          |          |
| 515         | PZB01460.1           |         |         |             |         |         |         | x         |                |         |          |          |          |
| 516         | PZA03109.3           |         |         |             |         |         | x       |           |                |         |          |          |          |
| 517         | PZA03109.2           |         |         |             |         |         | x       |           |                |         |          |          |          |
| 518         | PZA03109.1           |         |         |             |         |         | x       |           |                |         |          |          |          |
| 519         | PZA03106.1           |         |         |             |         |         | x       |           |                |         |          |          |          |
| 520         | PZA03107.1           |         |         |             |         |         | x       |           |                |         |          |          |          |
| 521         | PZB02080.2           |         |         |             |         |         |         | x         |                |         |          |          |          |
| 522         | PZB02080.1           |         |         |             |         |         |         | x         |                |         |          |          |          |
| 523         | MZB00125.2           |         |         |             |         |         | x       |           |                |         |          |          |          |

| SNP number* | SNP context sequence | aba syn | aba reg | stres s tol | cho met | cho reg | oth met | flw T reg | othr repro reg | oth reg | chrn mod | micr RNA | oth knwn |
|-------------|----------------------|---------|---------|-------------|---------|---------|---------|-----------|----------------|---------|----------|----------|----------|
| 524         | PZB01619.2           |         |         |             |         |         |         |           |                |         |          |          | x        |
| 525         | PZA03643.2           |         |         |             |         |         |         |           |                |         | x        |          |          |
| 526         | PZA03643.1           |         |         |             |         |         |         |           |                |         | x        |          |          |
| 527         | PZA03693.1           |         |         |             |         |         |         |           |                |         | x        |          |          |
| 528         | PZA03247.1           |         |         |             |         |         | x       |           |                |         |          |          |          |
| 529         | PZA03247.3           |         |         |             |         |         | x       |           |                |         |          |          |          |
| 530         | PZA03385.1           |         |         |             |         |         |         |           |                | x       |          |          |          |
| 531         | PZA03385.2           |         |         | x           |         |         |         |           |                |         |          |          |          |
| 532         | PZA03420.1           |         |         |             |         |         |         |           |                | x       |          |          |          |
| 533         | PZA03338.6           |         |         |             |         |         |         |           |                |         |          | x        |          |
| 534         | PZA03338.2           |         |         |             |         |         |         |           |                |         |          | x        |          |
| 535         | PZB01944.3           |         |         |             |         |         |         |           |                | x       |          |          |          |
| 536         | PZB01944.1           |         |         |             |         |         |         |           |                | x       |          |          |          |
| 537         | PZA03706.1           |         |         |             | x       |         |         |           |                |         |          |          |          |
| 538         | PZA03254.1           |         |         |             |         |         | x       |           |                |         |          |          |          |
| 539         | PZA03254.2           |         |         |             |         |         | x       |           |                |         |          |          |          |
| 540         | PZA03254.3           |         |         |             |         |         | x       |           |                |         |          |          |          |
| 541         | PZA03705.1           |         |         |             |         |         | x       |           |                |         |          |          |          |
| 542         | PZA03586.1           |         |         |             |         |         |         |           |                |         | x        |          |          |
| 543         | PZA03751.1           |         |         |             |         |         |         |           |                |         |          |          |          |
| 544         | PZA03752.2           |         |         |             |         |         |         |           |                |         |          |          |          |
| 545         | PZA03752.1           |         |         |             |         |         |         |           |                |         |          |          |          |
| 546         | PZA03753.2           |         |         |             |         |         |         |           |                |         | x        |          |          |
| 547         | PZA03753.1           |         |         |             |         |         |         |           |                |         | x        |          |          |
| 548         | PZA03587.2           |         |         |             |         |         |         |           |                |         | x        |          |          |
| 549         | PZA03753.3           |         |         |             |         |         |         |           |                |         | x        |          |          |
| 550         | PZA03597.1           |         |         |             |         |         |         |           |                |         |          |          |          |
| 551         | PZA03270.1           |         |         |             |         |         |         |           |                | x       |          |          |          |
| 552         | PZA03270.5           |         |         |             |         |         |         |           |                | x       |          |          |          |
| 553         | PZA03372.3           |         |         |             |         |         |         |           |                |         |          |          |          |
| 554         | PZA03564.2           |         |         |             | x       |         |         |           |                |         |          |          |          |
| 555         | PZA03564.1           |         |         |             | x       |         |         |           |                |         |          |          |          |
| 556         | PZA03562.1           |         |         | x           |         |         |         |           |                |         |          |          |          |
| 557         | PZA03562.3           |         |         | x           |         |         |         |           |                |         |          |          |          |
| 558         | PZA03203.1           |         |         |             |         |         |         |           |                | x       |          |          |          |
| 559         | PZA03367.2           |         |         |             | x       |         |         |           |                |         |          |          |          |
| 560         | PZA03367.1           |         |         |             | x       |         |         |           |                |         |          |          |          |
| 561         | PZA03231.1           |         |         |             |         |         |         |           |                |         |          |          |          |
| 562         | PZA03536.2           |         |         |             |         |         |         |           |                | x       |          |          |          |
| 563         | PZA03536.1           |         |         |             |         |         |         |           |                | x       |          |          |          |
| 564         | PZA03535.3           |         |         |             |         |         |         |           |                | x       |          |          |          |

| SNP number* | SNP context sequence | aba syn | aba reg | stres s tol | cho met | cho reg | oth met | flw T reg | othr repro reg | oth reg | chrn mod | micr RNA | oth knwn |
|-------------|----------------------|---------|---------|-------------|---------|---------|---------|-----------|----------------|---------|----------|----------|----------|
| 565         | PZA03535.2           |         |         |             |         |         |         |           |                | x       |          |          |          |
| 566         | PZB02053.3           |         |         |             |         |         |         | x         |                |         |          |          |          |
| 567         | PZB02053.1           |         |         |             |         |         |         | x         |                |         |          |          |          |
| 568         | PZB02053.2           |         |         |             |         |         |         | x         |                |         |          |          |          |
| 569         | PZA03376.1           |         |         |             |         |         |         |           |                |         |          |          |          |
| 570         | PZA03376.2           |         |         |             |         |         |         |           |                |         |          |          |          |
| 571         | PZB00104.3           |         |         |             |         |         |         | x         |                |         |          |          |          |
| 572         | PZB00104.2           |         |         |             |         |         |         | x         |                |         |          |          |          |
| 573         | PZB00104.1           |         |         |             |         |         |         | x         |                |         |          |          |          |
| 574         | PZA03409.1           |         |         |             |         |         |         |           |                |         |          |          |          |
| 575         | PZA03409.2           |         |         |             |         |         |         |           |                |         |          |          |          |
| 576         | PZA03409.4           |         |         |             |         |         |         |           |                |         |          |          |          |
| 577         | PZA03409.3           |         |         |             |         |         |         |           |                |         |          |          |          |
| 578         | PZB01080.2           |         |         |             | x       |         |         |           |                |         |          |          |          |
| 579         | PZB01689.1           |         |         |             | x       |         |         |           |                |         |          |          |          |
| 580         | PZB01689.3           |         |         |             | x       |         |         |           |                |         |          |          |          |
| 581         | PZB01689.2           |         |         |             | x       |         |         |           |                |         |          |          |          |
| 582         | PZA03288.2           |         |         |             |         |         |         |           |                |         |          | ?        |          |
| 583         | PZA03174.3           |         |         |             |         |         |         |           | x              |         |          |          |          |
| 584         | PZA03297.3           |         |         |             |         |         |         |           |                |         |          | ?        |          |
| 585         | PZA03297.1           |         |         |             |         |         |         |           |                |         |          | ?        |          |
| 586         | PZA03331.5           |         |         |             |         |         |         |           |                |         |          | x        |          |
| 587         | PZA03331.7           |         |         |             |         |         |         |           |                |         |          | x        |          |
| 588         | PZA03311.7           |         |         |             |         |         |         |           |                |         |          | ?        |          |
| 589         | PZA03347.6           |         |         |             |         |         |         |           |                |         |          | x        |          |
| 590         | PZB00229.2           |         |         |             |         |         |         | x         |                |         |          |          |          |
| 591         | PZB01378.2           |         | x       |             |         |         |         |           |                |         |          |          |          |
| 592         | PZB01378.3           |         | x       |             |         |         |         |           |                |         |          |          |          |
| 593         | PZB01378.5           |         | x       |             |         |         |         |           |                |         |          |          |          |
| 594         | PZB01378.4           |         | x       |             |         |         |         |           |                |         |          |          |          |
| 595         | PZA03653.1           |         |         |             |         |         |         |           |                |         | x        |          |          |
| 596         | PZA03654.1           |         |         |             |         |         |         |           |                |         | x        |          |          |
| 597         | PZA03654.2           |         |         |             |         |         |         |           |                |         | x        |          |          |
| 598         | PZA03379.1           |         |         |             |         |         |         |           |                |         |          |          |          |
| 599         | PZA03379.2           |         |         |             |         |         |         |           |                |         |          |          |          |
| 600         | PZA03308.3           |         |         |             |         |         |         |           |                |         |          | ?        |          |
| 601         | PZA03308.2           |         |         |             |         |         |         |           |                |         |          | ?        |          |
| 602         | PZA03406.1           |         |         |             |         |         |         |           |                |         |          |          |          |
| 603         | PZA03314.1           |         |         |             |         |         |         |           |                |         |          | ?        |          |
| 604         | PZB02464.1           |         |         |             |         |         | x       |           |                |         |          |          |          |
| 605         | PZD00030.9           |         |         |             |         |         |         |           | x              |         |          |          |          |







| SNP number* | SNP context sequence | aba syn | aba reg | stres s tol | cho met | cho reg | oth met | flw T reg | othr repro reg | oth reg | chrm mod | micr RNA | oth knwn |
|-------------|----------------------|---------|---------|-------------|---------|---------|---------|-----------|----------------|---------|----------|----------|----------|
| 688         | PZB00869.1           |         |         |             | x       |         |         |           |                |         |          |          |          |
| 689         | PZA03621.1           |         |         |             |         |         |         |           |                |         |          |          |          |
| 690         | PZA03289.5           |         |         |             |         |         |         |           |                |         |          | ?        |          |
| 691         | PZA03289.4           |         |         |             |         |         |         |           |                |         |          | ?        |          |
| 692         | PZB00073.1           |         |         |             |         |         |         | x         |                |         |          |          |          |
| 693         | PZB01004.2           |         |         |             |         |         | x       |           |                |         |          |          |          |
| 694         | PZB01004.1           |         |         |             |         |         | x       |           |                |         |          |          |          |
| 695         | PZA03451.7           |         |         |             |         |         |         |           |                | x       |          |          |          |
| 696         | PZA03451.6           |         |         |             |         |         |         |           |                |         |          |          |          |
| 697         | PZB01271.1           |         |         |             | x       |         |         |           |                |         |          |          |          |
| 698         | PZA03426.1           |         |         |             |         |         |         |           |                |         |          |          |          |
| 699         | PZB01115.4           |         |         |             |         |         |         |           | x              |         |          |          |          |
| 700         | PZB01115.3           |         |         |             |         |         |         |           | x              |         |          |          |          |
| 701         | PZB01336.6           |         |         |             | x       |         |         |           |                |         |          |          |          |
| 702         | PZB01336.3           |         |         |             | x       |         |         |           |                |         |          |          |          |
| 703         | PZA03411.3           |         |         |             |         |         |         |           |                |         |          |          |          |
| 704         | PZA03411.2           |         |         |             |         |         |         |           |                |         |          |          |          |
| 705         | PZB02023.1           |         |         |             |         |         |         | x         |                |         |          |          |          |
| 706         | PZA03356.1           |         |         |             |         |         |         |           |                |         |          |          |          |
| 707         | PZA03399.2           |         |         |             |         |         |         |           |                |         |          |          |          |
| 708         | PZA03399.1           |         |         |             |         |         |         |           |                |         |          |          |          |
| 709         | PZB01112.5           |         |         |             |         |         |         |           | x              |         |          |          |          |
| 710         | PZA03677.3           |         |         |             |         |         |         |           |                |         | x        |          |          |
| 711         | PZA03677.4           |         |         |             |         |         |         |           |                |         | x        |          |          |
| 712         | PZA03677.2           |         |         |             |         |         |         |           |                |         | x        |          |          |
| 713         | PZA03594.1           |         |         |             |         |         |         |           |                |         | x        |          |          |
| 714         | PZB02425.3           |         |         |             |         |         | x       |           |                |         |          |          |          |
| 715         | PZB02425.2           |         |         |             |         |         | x       |           |                |         |          |          |          |
| 716         | PZA03284.3           |         |         |             |         |         |         |           |                |         |          | ?        |          |
| 717         | PZA03284.4           |         |         |             |         |         |         |           |                |         |          | ?        |          |
| 718         | PZB02059.1           |         |         |             |         |         |         | x         |                |         |          |          |          |
| 719         | PZB02059.3           |         |         |             |         |         |         | x         |                |         |          |          |          |
| 720         | PZA03380.1           |         |         |             | x       |         |         |           |                |         |          |          |          |
| 721         | PZB01632.2           |         |         |             |         |         |         |           |                |         |          |          |          |
| 722         | PZB01632.1           |         |         |             |         |         |         |           |                |         |          |          |          |
| 723         | PZB01632.3           |         |         |             |         |         |         |           |                |         |          |          |          |
| 724         | PZB00969.1           |         |         |             |         |         | x       |           |                |         |          |          |          |
| 725         | PZB02491.1           |         |         |             |         |         | x       |           |                |         |          |          |          |
| 726         | PZB01017.2           |         |         |             |         |         | x       |           |                |         |          |          |          |
| 727         | PZB01017.4           |         |         |             |         |         | x       |           |                |         |          |          |          |
| 728         | PZB01017.3           |         |         |             |         |         | x       |           |                |         |          |          |          |





| SNP number* | SNP context sequence | aba syn | aba reg | stres s tol | cho met | cho reg | oth met | flw T reg | othr repro reg | oth reg | chrn mod | micr RNA | oth knwn |
|-------------|----------------------|---------|---------|-------------|---------|---------|---------|-----------|----------------|---------|----------|----------|----------|
| 811         | PZB01881.12          | x       |         |             |         |         |         |           |                |         |          |          |          |
| 812         | PZB01881.10          | x       |         |             |         |         |         |           |                |         |          |          |          |
| 813         | PZB01881.11          | x       |         |             |         |         |         |           |                |         |          |          |          |
| 814         | PZB01877.1           | x       |         |             |         |         |         |           |                |         |          |          |          |
| 815         | PZB01051.1           |         |         |             | x       |         |         |           |                |         |          |          |          |
| 816         | PZB01658.2           |         |         |             |         |         |         |           | x              |         |          |          |          |
| 817         | PZB00555.2           |         |         |             | x       |         |         |           |                |         |          |          |          |
| 818         | PZB00563.3           |         |         |             | x       |         |         |           |                |         |          |          |          |
| 819         | PZB00416.6           |         |         |             |         |         |         | x         |                |         |          |          |          |
| 820         | PZD00011.4           |         |         |             |         |         |         |           | x              |         |          |          |          |
| 821         | PZD00011.5           |         |         |             |         |         |         |           | x              |         |          |          |          |
| 822         | PZD00011.1           |         |         |             |         |         |         |           | x              |         |          |          |          |
| 823         | PZA03750.2           |         |         | x           |         |         |         |           |                |         |          |          |          |
| 824         | PZA03555.1           |         |         |             |         |         |         |           |                |         |          |          |          |
| 825         | PZA03550.2           |         |         | x           |         |         |         |           |                |         |          |          |          |
| 826         | PZA03550.1           |         |         | x           |         |         |         |           |                |         |          |          |          |
| 827         | PZA03546.1           |         |         |             |         |         |         |           | x              |         |          |          |          |
| 828         | PZB01308.2           |         |         |             | x       |         |         |           |                |         |          |          |          |
| 829         | PZB01308.3           |         |         |             | x       |         |         |           |                |         |          |          |          |
| 830         | PZB02514.1           |         |         |             |         |         |         | x         |                |         |          |          |          |
| 831         | PZB02514.2           |         |         |             |         |         |         | x         |                |         |          |          |          |
| 832         | PZB02514.3           |         |         |             |         |         |         | x         |                |         |          |          |          |
| 833         | PZB01549.1           |         |         |             |         |         |         |           | x              |         |          |          |          |
| 834         | PZA03745.1           |         |         |             |         |         |         |           |                |         |          |          |          |
| 835         | PZA03646.1           |         |         |             |         |         |         |           |                |         | x        |          |          |
| 836         | PZA03646.2           |         |         |             |         |         |         |           |                |         | x        |          |          |
| 837         | PZB01569.10          |         |         | x           |         |         |         |           |                |         |          |          |          |
| 838         | PZB01569.8           |         |         | x           |         |         |         |           |                |         |          |          |          |
| 839         | PZB01569.11          |         |         | x           |         |         |         |           |                |         |          |          |          |
| 840         | PZB01569.9           |         |         | x           |         |         |         |           |                |         |          |          |          |
| 841         | PZB01388.2           | x       |         |             |         |         |         |           |                |         |          |          |          |
| 842         | PZB01388.1           | x       |         |             |         |         |         |           |                |         |          |          |          |
| 843         | PZA03151.2           |         |         |             |         |         |         |           |                |         | x        |          |          |
| 844         | PZA03449.4           |         |         |             |         |         |         | x         |                |         |          |          |          |
| 845         | PZA03449.3           |         |         |             |         |         |         |           |                |         |          |          |          |
| 846         | PZB00140.1           |         |         |             |         |         |         | x         |                |         |          |          |          |
| 847         | PZD00057.2           |         |         |             |         |         |         |           | x              |         |          |          |          |
| 848         | PZD00057.1           |         |         |             |         |         |         |           | x              |         |          |          |          |
| 849         | PZD00057.4           |         |         |             |         |         |         |           | x              |         |          |          |          |
| 850         | PZD00057.3           |         |         |             |         |         |         |           | x              |         |          |          |          |
| 851         | PZB01960.1           |         |         |             |         |         |         |           |                | x       |          |          |          |

| SNP number* | SNP context sequence | aba syn | aba reg | stres s tol | cho met | cho reg | oth met | flw T reg | othr repro reg | oth reg | chrn mod | micr RNA | oth knwn |
|-------------|----------------------|---------|---------|-------------|---------|---------|---------|-----------|----------------|---------|----------|----------|----------|
| 852         | PZB01482.2           |         |         |             |         |         |         |           |                | x       |          |          |          |
| 853         | PZB01482.3           |         |         |             |         |         |         |           |                | x       |          |          |          |
| 854         | PZB01482.1           |         |         |             |         |         |         |           |                | x       |          |          |          |
| 855         | PZB01083.4           |         |         |             | x       |         |         |           |                |         |          |          |          |
| 856         | PZA03757.1           |         |         |             |         |         |         |           |                |         | x        |          |          |
| 857         | PZB02215.7           |         | x       |             |         |         |         |           |                |         |          |          |          |
| 858         | PZB02215.10          |         | x       |             |         |         |         |           |                |         |          |          |          |
| 859         | PZB02215.5           |         | x       |             |         |         |         |           |                |         |          |          |          |
| 860         | PZB02215.3           |         | x       |             |         |         |         |           |                |         |          |          |          |
| 861         | PZB02215.9           |         | x       |             |         |         |         |           |                |         |          |          |          |
| 862         | PZB02215.4           |         | x       |             |         |         |         |           |                |         |          |          |          |
| 863         | PZA03617.1           |         |         |             |         |         |         |           |                |         | x        |          |          |
| 864         | PZB02547.1           |         |         |             |         |         |         |           |                |         | x        |          |          |
| 865         | PZB02544.2           |         |         |             |         |         |         |           |                |         | x        |          |          |
| 866         | PZB02544.1           |         |         |             |         |         |         |           |                |         | x        |          |          |
| 867         | PZB02544.3           |         |         |             |         |         |         |           |                |         | x        |          |          |
| 868         | PZB02542.3           |         |         |             |         |         |         |           |                |         | x        |          |          |
| 869         | PZB02542.2           |         |         |             |         |         |         |           |                |         | x        |          |          |
| 870         | PZB02542.1           |         |         |             |         |         |         |           |                |         | x        |          |          |
| 871         | PZB01617.2           |         |         |             |         |         | x       |           |                |         |          |          |          |
| 872         | PZB01612.2           |         |         |             |         |         | x       |           |                |         |          |          |          |
| 873         | PZB01612.3           |         |         |             |         |         | x       |           |                |         |          |          |          |
| 874         | PZB01612.1           |         |         |             |         |         | x       |           |                |         |          |          |          |
| 875         | PZB01228.2           |         |         |             |         |         |         |           | x              |         |          |          |          |
| 876         | PZB01228.7           |         |         |             |         |         |         |           | x              |         |          |          |          |
| 877         | PZB01228.4           |         |         |             |         |         |         |           | x              |         |          |          |          |
| 878         | PZA03623.2           |         |         |             |         |         |         |           |                |         | x        |          |          |
| 879         | PZA03623.1           |         |         |             |         |         |         |           |                |         | x        |          |          |
| 880         | PZA03624.1           |         |         |             |         |         |         |           |                |         | x        |          |          |
| 881         | PZA03624.2           |         |         |             |         |         |         |           |                |         | x        |          |          |
| 882         | PZA03624.3           |         |         |             |         |         |         |           |                |         | x        |          |          |
| 883         | PZA03625.1           |         |         |             |         |         |         |           |                |         | x        |          |          |
| 884         | PZA03626.2           |         |         |             |         |         |         |           |                |         | x        |          |          |
| 885         | PZA03626.1           |         |         |             |         |         |         |           |                |         | x        |          |          |
| 886         | PZA03687.1           |         |         |             |         |         |         |           |                |         | x        |          |          |
| 887         | PZA03688.3           |         |         |             |         |         |         |           |                |         | x        |          |          |
| 888         | PZA03565.2           |         |         |             |         |         | x       |           |                |         |          |          |          |
| 889         | PZA03723.1           |         |         |             |         |         | x       |           |                |         |          |          |          |
| 890         | PZA03723.4           |         |         |             |         |         | x       |           |                |         |          |          |          |
| 891         | PZA03723.2           |         |         |             |         |         | x       |           |                |         |          |          |          |
| 892         | PZA03723.5           |         |         |             |         |         | x       |           |                |         |          |          |          |

| SNP number* | SNP context sequence | aba syn | aba reg | stres s tol | cho met | cho reg | oth met | flw T reg | othr repro reg | oth reg | chrn mod | micr RNA | oth knwn |
|-------------|----------------------|---------|---------|-------------|---------|---------|---------|-----------|----------------|---------|----------|----------|----------|
| 893         | PZA03723.3           |         |         |             |         |         | x       |           |                |         |          |          |          |
| 894         | PZA03722.1           |         |         |             |         |         | x       |           |                |         |          |          |          |
| 895         | PZA03363.1           |         |         |             |         |         |         |           |                |         |          |          |          |
| 896         | PZA03676.1           |         |         |             |         |         |         |           |                |         | x        |          |          |
| 897         | PZA03676.4           |         |         |             |         |         |         |           |                |         | x        |          |          |
| 898         | PZA03676.2           |         |         |             |         |         |         |           |                |         | x        |          |          |
| 899         | PZA03676.3           |         |         |             |         |         |         |           |                |         | x        |          |          |
| 900         | PZA03675.1           |         |         |             |         |         |         |           |                |         | x        |          |          |
| 901         | PZA03675.2           |         |         |             |         |         |         |           |                |         | x        |          |          |
| 902         | PZA03386.1           |         |         |             |         |         |         |           |                |         |          |          |          |
| 903         | PZA03645.1           |         |         |             |         |         |         |           |                |         | x        |          |          |
| 904         | PZA03645.2           |         |         |             |         |         |         |           |                |         | x        |          |          |
| 905         | PZB00109.2           |         |         |             |         |         |         | x         |                |         |          |          |          |
| 906         | PZB00109.1           |         |         |             |         |         |         | x         |                |         |          |          |          |
| 907         | PZA03143.4           |         |         |             |         |         |         |           |                | x       |          |          |          |
| 908         | PZA03149.4           |         |         |             |         |         |         |           |                | x       |          |          |          |
| 909         | PZB00175.2           |         |         |             |         |         |         | x         |                |         |          |          |          |
| 910         | PZB00175.6           |         |         |             |         |         |         | x         |                |         |          |          |          |
| 911         | Ra1.1                |         |         |             |         |         |         |           | x              |         |          |          |          |
| 912         | PZB01186.3           |         |         |             |         |         | x       |           |                |         |          |          |          |
| 913         | PZB01186.2           |         |         |             |         |         | x       |           |                |         |          |          |          |
| 914         | PZB01186.1           |         |         |             |         |         | x       |           |                |         |          |          |          |
| 915         | PZB01186.4           |         |         |             |         |         | x       |           |                |         |          |          |          |
| 916         | PZB02139.1           |         |         |             |         |         |         | x         |                |         |          |          |          |
| 917         | PZA03583.2           |         |         |             |         |         | x       |           |                |         |          |          |          |
| 918         | PZA03583.1           |         |         |             |         |         | x       |           |                |         |          |          |          |
| 919         | PZD00054.1           |         |         |             |         |         |         |           | x              |         |          |          |          |
| 920         | PZB00752.1           |         |         |             |         |         | x       |           |                |         |          |          |          |
| 921         | PZB00752.2           |         |         |             |         |         | x       |           |                |         |          |          |          |
| 922         | PZA03739.1           |         |         |             |         |         |         |           |                | x       |          |          |          |
| 923         | PZA03738.3           |         |         |             |         |         |         |           |                |         |          |          |          |
| 924         | PZA03738.2           |         |         |             |         |         |         |           |                |         |          |          |          |
| 925         | PZA03737.1           |         |         |             |         |         |         |           |                |         |          |          |          |
| 926         | PZA03727.1           |         |         |             | x       |         |         |           |                |         |          |          |          |
| 927         | PZA03728.1           |         |         |             | x       |         |         |           |                |         |          |          |          |
| 928         | PZA03728.2           |         |         |             | x       |         |         |           |                |         |          |          |          |
| 929         | PZA03728.3           |         |         |             | x       |         |         |           |                |         |          |          |          |
| 930         | PZA03400.1           |         |         |             |         |         |         |           |                |         |          |          |          |
| 931         | PZA03574.5           |         |         |             |         |         |         |           |                |         | x        |          |          |
| 932         | PZA03574.1           |         |         |             |         |         |         |           |                |         | x        |          |          |
| 933         | PZA03574.3           |         |         |             |         |         |         |           |                |         | x        |          |          |

| SNP number* | SNP context sequence | aba syn | aba reg | stres s tol | cho met | cho reg | oth met | flw T reg | othr repro reg | oth reg | chrn mod | micr RNA | oth knwn |
|-------------|----------------------|---------|---------|-------------|---------|---------|---------|-----------|----------------|---------|----------|----------|----------|
| 934         | PZA03574.2           |         |         |             |         |         |         |           |                |         | x        |          |          |
| 935         | PZA03397.1           |         |         |             |         |         | x       |           |                |         |          |          |          |
| 936         | PZB00062.9           |         |         |             |         |         |         | x         |                |         |          |          |          |
| 937         | PZA03544.5           |         |         | x           |         |         |         |           |                |         |          |          |          |
| 938         | PZA03544.3           |         |         | x           |         |         |         |           |                |         |          |          |          |
| 939         | PZA03544.4           |         |         | x           |         |         |         |           |                |         |          |          |          |
| 940         | PZA03544.2           |         |         | x           |         |         |         |           |                |         |          |          |          |
| 941         | PZB01238.7           |         |         |             |         |         |         |           | x              |         |          |          |          |
| 942         | PZB00597.1           |         |         |             | x       |         |         |           |                |         |          |          |          |
| 943         | PZB00595.1           |         |         |             | x       |         |         |           |                |         |          |          |          |
| 944         | PZB00597.2           |         |         |             | x       |         |         |           |                |         |          |          |          |
| 945         | PZA03368.3           |         |         |             |         |         |         |           |                | x       |          |          |          |
| 946         | PZA03368.4           |         |         |             |         |         |         |           |                | x       |          |          |          |
| 947         | PZA03368.1           |         |         |             |         |         |         |           |                | x       |          |          |          |
| 948         | PZB02448.2           |         |         |             |         |         | x       |           |                |         |          |          |          |
| 949         | PZB02448.1           |         |         |             |         |         | x       |           |                |         |          |          |          |
| 950         | PZB00123.1           |         |         |             |         |         | x       |           |                |         |          |          |          |
| 951         | PZB00605.4           |         |         |             | x       |         |         |           |                |         |          |          |          |
| 952         | PZB00605.2           |         |         |             | x       |         |         |           |                |         |          |          |          |
| 953         | PZB00605.3           |         |         |             | x       |         |         |           |                |         |          |          |          |
| 954         | PZA03295.2           |         |         |             |         |         |         |           |                |         |          | ?        |          |
| 955         | PZB01638.1           |         |         |             |         |         |         |           |                | x       |          |          |          |
| 956         | PZB01638.3           |         |         |             |         |         |         |           |                | x       |          |          |          |
| 957         | PZB02070.1           |         |         |             |         |         |         | x         |                |         |          |          |          |
| 958         | PZA03316.4           |         |         |             |         |         |         |           |                |         |          | ?        |          |
| 959         | PZA03316.3           |         |         |             |         |         |         |           |                |         |          | ?        |          |
| 960         | PZA03178.1           |         |         |             |         |         |         |           |                | x       |          |          |          |
| 961         | PZB01977.2           |         | x       |             |         |         |         |           |                |         |          |          |          |
| 962         | PZB01977.7           |         | x       |             |         |         |         |           |                |         |          |          |          |
| 963         | PZB01977.11          |         | x       |             |         |         |         |           |                |         |          |          |          |
| 964         | PZB01977.4           |         | x       |             |         |         |         |           |                |         |          |          |          |
| 965         | PZB01977.6           |         | x       |             |         |         |         |           |                |         |          |          |          |
| 966         | PZB01977.5           |         | x       |             |         |         |         |           |                |         |          |          |          |
| 967         | PZB01977.10          |         | x       |             |         |         |         |           |                |         |          |          |          |
| 968         | PZB01977.1           |         | x       |             |         |         |         |           |                |         |          |          |          |
| 969         | PZB01977.9           |         | x       |             |         |         |         |           |                |         |          |          |          |
| 970         | PZB01977.3           |         | x       |             |         |         |         |           |                |         |          |          |          |
| 971         | PZA03526.1           |         |         |             |         |         |         |           |                | x       |          |          |          |
| 972         | PZB01475.1           |         |         |             |         |         |         |           |                | x       |          |          |          |
| 973         | PZB01475.2           |         |         |             |         |         |         |           |                | x       |          |          |          |
| 974         | PZD00034.4           |         |         |             |         |         |         |           | x              |         |          |          |          |





| SNP number* | SNP context sequence | aba syn | aba reg | stres s tol | cho met | cho reg | oth met | flw T reg | oth repro reg | oth reg | chrn mod | micr RNA | oth knwn |
|-------------|----------------------|---------|---------|-------------|---------|---------|---------|-----------|---------------|---------|----------|----------|----------|
| 1016        | PZA03395.3           |         |         |             |         |         |         |           |               |         |          |          |          |
| 1017        | PZB01389.2           |         | x       |             |         |         |         |           |               |         |          |          |          |
| 1018        | PZB01389.1           |         | x       |             |         |         |         |           |               |         |          |          |          |
| 1019        | PZA03591.1           |         |         |             |         |         |         |           |               |         | x        |          |          |
| 1020        | PZA03591.3           |         |         |             |         |         |         |           |               |         | x        |          |          |
| 1021        | PZA03591.2           |         |         |             |         |         |         |           |               |         | x        |          |          |
| 1022        | PZA03590.1           |         |         |             |         |         |         |           |               |         |          |          |          |
| 1023        | LYCE.1               | x       |         |             |         |         |         |           |               |         |          |          |          |
| 1024        | LYCE.4               | x       |         |             |         |         |         |           |               |         |          |          |          |
| 1025        | LYCE.5               | x       |         |             |         |         |         |           |               |         |          |          |          |
| 1026        | PZA03608.2           |         |         |             |         |         |         |           |               |         |          |          |          |
| 1027        | PZA03608.1           |         |         |             |         |         |         | x         |               |         |          |          |          |
| 1028        | PZB01454.3           |         |         | x           |         |         |         |           |               |         |          |          |          |
| 1029        | PZA03651.2           |         |         |             |         |         |         |           |               |         | x        |          |          |
| 1030        | PZA03652.2           |         |         |             |         |         |         |           |               |         | x        |          |          |
| 1031        | PZA03652.1           |         |         |             |         |         |         |           |               |         | x        |          |          |
| 1032        | PZA03652.3           |         |         |             |         |         |         |           |               |         | x        |          |          |
| 1033        | PZA03153.3           |         |         |             |         |         |         |           |               | x       |          |          |          |
| 1034        | PZA03182.2           |         |         |             |         |         |         |           |               | x       |          |          |          |
| 1035        | PZA03182.3           |         |         |             |         |         |         |           |               | x       |          |          |          |
| 1036        | PZA03171.3           |         |         |             |         |         |         |           |               | x       |          |          |          |
| 1037        | PZA03695.2           |         |         |             |         |         |         |           |               |         | x        |          |          |
| 1038        | PZA03695.1           |         |         |             |         |         |         |           |               |         | x        |          |          |
| 1039        | PZA03696.3           |         |         |             |         |         |         |           |               |         | x        |          |          |
| 1040        | PZA03696.1           |         |         |             |         |         |         |           |               |         | x        |          |          |
| 1041        | PZA03696.2           |         |         |             |         |         |         |           |               |         | x        |          |          |
| 1042        | PZA03697.1           |         |         |             |         |         |         |           |               |         | x        |          |          |
| 1043        | PZA03698.1           |         |         |             |         |         |         |           |               |         | x        |          |          |
| 1044        | PZA03698.3           |         |         |             |         |         |         |           |               |         | x        |          |          |
| 1045        | PZA03698.2           |         |         |             |         |         |         |           |               |         | x        |          |          |
| 1046        | PZB02040.1           |         |         |             |         |         |         | x         |               |         |          |          |          |
| 1047        | PZA03388.2           |         |         |             |         |         | x       |           |               |         |          |          |          |
| 1048        | PZA03388.1           |         |         |             |         |         | x       |           |               |         |          |          |          |
| 1049        | PZA03592.2           |         |         |             |         |         |         |           |               |         |          |          |          |
| 1050        | PZA03592.1           |         |         |             |         |         |         |           |               |         |          |          |          |
| 1051        | PZA03592.3           |         |         |             |         |         |         |           |               |         |          |          |          |
| 1052        | PZA03593.1           |         |         |             |         |         |         |           |               |         |          |          |          |
| 1053        | PZA03593.2           |         |         |             |         |         |         |           |               |         |          |          |          |
| 1054        | PZB00700.1           | x       |         |             |         |         |         |           |               |         |          |          |          |
| 1055        | PZB00007.3           |         |         |             |         |         |         | x         |               |         |          |          |          |
| 1056        | PZB01954.1           |         |         |             |         |         |         |           |               | x       |          |          |          |

| SNP number* | SNP context sequence | aba syn | aba reg | stres s tol | cho met | cho reg | oth met | flw T reg | othr repro reg | oth reg | chrn mod | micr RNA | oth knwn |
|-------------|----------------------|---------|---------|-------------|---------|---------|---------|-----------|----------------|---------|----------|----------|----------|
| 1057        | PZA03446.1           |         |         |             |         |         |         |           |                | x       |          |          |          |
| 1058        | PZB01057.4           |         |         |             | x       |         |         |           |                |         |          |          |          |
| 1059        | PZA03202.2           |         |         |             |         |         |         |           |                | x       |          |          |          |
| 1060        | PZA03538.1           |         |         |             |         |         |         |           |                | x       |          |          |          |
| 1061        | PZA03537.1           |         |         |             |         |         |         |           |                | x       |          |          |          |
| 1062        | PZB01872.1           |         | x       |             |         |         |         |           |                |         |          |          |          |
| 1063        | PZB01872.2           |         | x       |             |         |         |         |           |                |         |          |          |          |
| 1064        | PZB00781.1           |         |         |             |         |         | x       |           |                |         |          |          |          |
| 1065        | PZA03431.1           |         |         |             |         |         |         |           |                |         |          |          |          |
| 1066        | PZD00047.2           |         |         |             |         |         |         |           | x              |         |          |          |          |
| 1067        | PZD00047.1           |         |         |             |         |         |         |           | x              |         |          |          |          |
| 1068        | PZA03416.9           |         |         |             |         |         | x       |           |                |         |          |          |          |
| 1069        | PZA03416.8           |         |         |             |         |         | x       |           |                |         |          |          |          |
| 1070        | PZA03416.6           |         |         |             |         |         | x       |           |                |         |          |          |          |
| 1071        | PZB00736.2           |         |         |             |         |         | x       |           |                |         |          |          |          |
| 1072        | PZB00736.4           |         |         |             |         |         | x       |           |                |         |          |          |          |
| 1073        | PZB01042.7           |         |         |             | x       |         |         |           |                |         |          |          |          |
| 1074        | PZB01110.6           |         |         |             |         |         |         |           | x              |         |          |          |          |
| 1075        | PZB01963.2           |         | x       |             |         |         |         |           |                |         |          |          |          |
| 1076        | PZB01963.6           |         | x       |             |         |         |         |           |                |         |          |          |          |
| 1077        | PZB01963.3           |         | x       |             |         |         |         |           |                |         |          |          |          |
| 1078        | PZB01963.1           |         | x       |             |         |         |         |           |                |         |          |          |          |
| 1079        | PZA03113.4           |         |         |             |         |         |         |           |                | x       |          |          |          |
| 1080        | PZB02423.1           |         |         |             |         |         | x       |           |                |         |          |          |          |
| 1081        | PZB02422.1           |         |         |             |         |         | x       |           |                |         |          |          |          |
| 1082        | PZB01114.6           |         |         |             |         |         |         |           | x              |         |          |          |          |
| 1083        | PZB01114.2           |         |         |             |         |         |         |           | x              |         |          |          |          |
| 1084        | PZA03759.2           |         |         |             |         |         |         |           |                |         |          |          |          |
| 1085        | PZA03759.1           |         |         |             |         |         |         |           |                |         |          |          |          |
| 1086        | PZA03758.1           |         |         |             |         |         |         |           |                |         | x        |          |          |
| 1087        | PZA03595.2           |         |         |             |         |         |         |           |                | x       |          |          |          |
| 1088        | PZA03595.1           |         |         |             |         |         |         |           |                | x       |          |          |          |
| 1089        | PZA03595.3           |         |         |             |         |         |         |           |                | x       |          |          |          |
| 1090        | PZA03596.2           |         |         |             |         |         |         |           |                |         | x        |          |          |
| 1091        | PZA03596.3           |         |         |             |         |         |         |           |                |         | x        |          |          |
| 1092        | PZA03596.1           |         |         |             |         |         |         |           |                | x       |          |          |          |
| 1093        | PZB01899.3           |         | x       |             |         |         |         |           |                |         |          |          |          |
| 1094        | PZB01899.2           |         | x       |             |         |         |         |           |                |         |          |          |          |
| 1095        | PZA03253.1           |         |         |             |         |         | x       |           |                |         |          |          |          |
| 1096        | PZA03253.2           |         |         |             |         |         | x       |           |                |         |          |          |          |
| 1097        | PZB00967.2           |         |         |             |         |         | x       |           |                |         |          |          |          |

| SNP number* | SNP context sequence | aba syn | aba reg | stres s tol | cho met | cho reg | oth met | flw T reg | othr repro reg | oth reg | chrn mod | micr RNA | oth knwn |
|-------------|----------------------|---------|---------|-------------|---------|---------|---------|-----------|----------------|---------|----------|----------|----------|
| 1098        | PZB02480.2           |         |         |             |         |         | x       |           |                |         |          |          |          |
| 1099        | PZB02480.1           |         |         |             |         |         | x       |           |                |         |          |          |          |
| 1100        | PZB01358.4           | x       |         |             |         |         |         |           |                |         |          |          |          |
| 1101        | PZB01358.3           | x       |         |             |         |         |         |           |                |         |          |          |          |
| 1102        | PZB01358.2           | x       |         |             |         |         |         |           |                |         |          |          |          |
| 1103        | PZB01652.1           |         |         |             |         |         |         |           |                |         |          |          |          |
| 1104        | PZB01913.2           |         |         |             | x       |         |         |           |                |         |          |          |          |
| 1105        | PZB01913.1           |         |         |             | x       |         |         |           |                |         |          |          |          |
| 1106        | PZB01869.2           |         | x       |             |         |         |         |           |                |         |          |          |          |
| 1107        | PZB01869.4           |         | x       |             |         |         |         |           |                |         |          |          |          |
| 1108        | PZB01869.1           |         | x       |             |         |         |         |           |                |         |          |          |          |
| 1109        | PZB01867.5           |         | x       |             |         |         |         |           |                |         |          |          |          |
| 1110        | PZB01867.2           |         | x       |             |         |         |         |           |                |         |          |          |          |
| 1111        | PZA03235.2           |         | ?       |             |         |         |         |           |                |         |          |          |          |
| 1112        | PZA03235.3           |         | ?       |             |         |         |         |           |                |         |          |          |          |
| 1113        | PZB01292.2           |         |         |             | x       |         |         |           |                |         |          |          |          |
| 1114        | PZB01292.1           |         |         |             | x       |         |         |           |                |         |          |          |          |
| 1115        | PZB01292.3           |         |         |             | x       |         |         |           |                |         |          |          |          |
| 1116        | PZA03679.1           |         |         |             |         |         |         |           |                | x       |          |          |          |
| 1117        | PZB01432.1           |         |         |             |         |         |         |           |                |         |          | x        |          |
| 1118        | PZB01432.3           |         |         |             |         |         |         |           |                |         |          | x        |          |
| 1119        | PZB01432.4           |         |         |             |         |         |         |           |                |         |          | x        |          |
| 1120        | PZB01432.2           |         |         |             |         |         |         |           |                |         |          | x        |          |
| 1121        | PZB02504.1           |         | x       |             |         |         |         |           |                |         |          |          |          |
| 1122        | PZB02504.3           |         | x       |             |         |         |         |           |                |         |          |          |          |
| 1123        | PZB00080.1           |         |         |             |         |         |         | x         |                |         |          |          |          |
| 1124        | PZB00080.2           |         |         |             |         |         |         | x         |                |         |          |          |          |
| 1125        | PZB02099.2           |         |         |             |         |         |         | x         |                |         |          |          |          |
| 1126        | PZA03669.1           |         |         |             |         |         |         |           |                | x       |          |          |          |
| 1127        | PZA03670.1           |         |         |             |         |         |         |           |                | x       |          |          |          |
| 1128        | PZA03671.1           |         |         |             |         |         |         |           |                | x       |          |          |          |
| 1129        | PZB00207.1           |         |         |             |         |         |         | x         |                |         |          |          |          |
| 1130        | PZB00126.1           |         |         |             |         |         | x       |           |                |         |          |          |          |
| 1131        | PZB00643.1           | x       |         |             |         |         |         |           |                |         |          |          |          |
| 1132        | PZB00643.2           | x       |         |             |         |         |         |           |                |         |          |          |          |
| 1133        | PZB01436.3           |         |         |             |         |         |         |           |                |         |          | x        |          |
| 1134        | PZB01436.1           |         |         |             |         |         |         |           |                |         |          | x        |          |
| 1135        | PZB00118.1           |         |         |             |         |         | x       |           |                |         |          |          |          |
| 1136        | PZB00118.2           |         |         |             |         |         | x       |           |                |         |          |          |          |
| 1137        | PZB00221.6           |         |         |             |         |         |         | x         |                |         |          |          |          |
| 1138        | PZB00221.1           |         |         |             |         |         |         | x         |                |         |          |          |          |

| SNP number* | SNP context sequence | aba syn | aba reg | stres s tol | cho met | cho reg | oth met | flw T reg | othr repro reg | oth reg | chrn mod | micr RNA | oth knwn |
|-------------|----------------------|---------|---------|-------------|---------|---------|---------|-----------|----------------|---------|----------|----------|----------|
| 1139        | PZD00055.2           |         |         |             |         |         |         |           | x              |         |          |          |          |
| 1140        | PZA03405.1           |         |         |             |         |         |         |           |                |         |          |          |          |
| 1141        | PZD00050.3           |         |         |             |         |         |         |           | x              |         |          |          |          |
| 1142        | PZD00050.2           |         |         |             |         |         |         |           | x              |         |          |          |          |
| 1143        | PZA03573.2           |         |         |             |         |         |         |           |                |         | x        |          |          |
| 1144        | PZA03573.3           |         |         |             |         |         |         |           |                |         | x        |          |          |
| 1145        | PZA03573.1           |         |         |             |         |         |         |           |                |         | x        |          |          |
| 1146        | PZA03573.4           |         |         |             |         |         |         |           |                |         | x        |          |          |
| 1147        | PZA03572.1           |         |         |             |         |         |         |           |                |         | x        |          |          |
| 1148        | PZA03572.2           |         |         |             |         |         |         |           |                |         | x        |          |          |
| 1149        | PZA03563.1           |         | x       |             |         |         |         |           |                |         |          |          |          |
| 1150        | PZA03571.2           |         | x       |             |         |         |         |           |                |         |          |          |          |
| 1151        | PZB01301.7           |         |         |             | x       |         |         |           |                |         |          |          |          |
| 1152        | PZB01301.6           |         |         |             | x       |         |         |           |                |         |          |          |          |
| 1153        | PZB01301.5           |         |         |             | x       |         |         |           |                |         |          |          |          |
| 1154        | PZD00032.2           |         |         |             |         |         |         |           | x              |         |          |          |          |
| 1155        | PZD00032.1           |         |         |             |         |         |         |           | x              |         |          |          |          |
| 1156        | PZD00032.3           |         |         |             |         |         |         |           | x              |         |          |          |          |
| 1157        | PZD00033.2           |         |         |             |         |         |         |           | x              |         |          |          |          |
| 1158        | PZB01178.1           |         |         |             |         |         | x       |           |                |         |          |          |          |
| 1159        | PZB02029.1           |         |         |             |         |         |         | x         |                |         |          |          |          |
| 1160        | PZA03157.2           |         |         |             |         |         |         |           |                | x       |          |          |          |
| 1161        | PZA03170.2           |         |         |             |         |         |         |           |                |         |          |          |          |
| 1162        | PZA03170.1           |         |         |             |         |         |         |           |                |         |          |          |          |
| 1163        | PZB02529.2           |         |         |             |         |         |         |           |                |         | x        |          |          |
| 1164        | PZB02529.1           |         |         |             |         |         |         |           |                |         | x        |          |          |
| 1165        | PZA03351.1           |         |         |             |         |         |         |           |                |         | x        |          |          |
| 1166        | PZA03585.1           |         |         |             |         |         | x       |           |                |         |          |          |          |
| 1167        | PZB00806.9           |         |         |             |         |         | x       |           |                |         |          |          |          |
| 1168        | PZB01042.8           |         |         |             | x       |         |         |           |                |         |          |          |          |
| 1169        | MZB00125.3           |         |         |             |         |         |         |           |                |         |          |          |          |
| 1170        | PZA03713.1           |         |         |             |         |         |         |           | x              |         |          |          |          |
| 1171        | PZA03711.2           |         |         |             |         |         |         |           | x              |         |          |          |          |
| 1172        | PZA03711.3           |         |         |             |         |         |         |           | x              |         |          |          |          |
| 1173        | PZA03711.1           |         |         |             |         |         |         |           | x              |         |          |          |          |
| 1174        | PZA03710.2           |         |         |             |         |         |         |           | x              |         |          |          |          |
| 1175        | PZA03710.4           |         |         |             |         |         |         |           | x              |         |          |          |          |
| 1176        | PZA03710.1           |         |         |             |         |         |         |           | x              |         |          |          |          |
| 1177        | PZA03710.5           |         |         |             |         |         |         |           | x              |         |          |          |          |
| 1178        | PZA03710.3           |         |         |             |         |         |         |           | x              |         |          |          |          |
| 1179        | PZA03710.6           |         |         |             |         |         |         |           | x              |         |          |          |          |



| SNP number* | SNP context sequence | aba syn | aba reg | stres s tol | cho met | cho reg | oth met | flw T reg | oth repro reg | oth reg | chrn mod | micr RNA | oth knwn |
|-------------|----------------------|---------|---------|-------------|---------|---------|---------|-----------|---------------|---------|----------|----------|----------|
| 1221        | PZA03429.1           |         |         |             |         |         | x       |           |               |         |          |          |          |
| 1222        | PZB01730.3           |         | x       |             |         |         |         |           |               |         |          |          |          |
| 1223        | PZB01730.2           |         | x       |             |         |         |         |           |               |         |          |          |          |
| 1224        | PZA03332.1           |         |         |             |         |         |         |           |               |         |          | x        |          |
| 1225        | PZB00050.3           |         |         |             |         |         |         | x         |               |         |          |          |          |
| 1226        | PZB00108.4           |         |         |             |         |         |         | x         |               |         |          |          |          |
| 1227        | PZB00648.4           | x       |         |             |         |         |         |           |               |         |          |          |          |
| 1228        | PZD00028.2           |         |         |             |         |         |         |           | x             |         |          |          |          |
