# Supplementary material for: Genetic association mapping identifies single nucleotide polymorphisms in genes that affect abscisic acid levels in maize floral tissues during drought
Source: PubMed Central journal article supplement — J Exp Bot. 2010 Nov 17;62(2):701–16. doi: 10.1093/jxb/erq308 (PMC3003815; doi:10.1093/jxb/erq308), 2010-11-17
Supplement: supp_erq308_00049361-file003.pdf [file supp_erq308_00049361-file003.pdf]

Supplement Table S4. SNP-trait associations with  $P < 10^{-4}$ , uncorrected for multiple comparisons\*

| SNP no. | SNP context<br>sequence no. | Chr. | SNP Position | SNP | MAF  | N   | organ | metab-<br>olite | date | treat-<br>ment | year | P        |
|---------|-----------------------------|------|--------------|-----|------|-----|-------|-----------------|------|----------------|------|----------|
| 465     | PZD00027.3                  | 3    | 169757661    | A/C | 0.09 | 345 | ear   | PA              | 0    | WW             | 2006 | 7.78E-11 |
| 186     | PZB01403.4                  | 1    | 285274032    | A/G | 0.05 | 332 | silk  | ABA             | 7    | WS             | 2006 | 2.83E-08 |
| 465     | PZD00027.3                  | 3    | 169757661    | A/C | 0.09 | 345 | ear   | PA              | 7    | WW             | 2006 | 3.55E-08 |
| 947     | PZA03368.1                  | 7    | 162878175    | C/T | 0.07 | 350 | silk  | tot sug         | 7    | WS             | 2006 | 3.47E-07 |
| 251     | PZB02017.1                  | 2    | 20958246     | A/T | 0.09 | 342 | ear   | Suc             | 7    | WS             | 2005 | 1.94E-06 |
| 255     | PZA03635.1                  | 2    | 21202350     | C/T | 0.09 | 342 | ear   | Suc             | 7    | WS             | 2005 | 2.11E-06 |
| 1145    | PZA03573.1                  | 9    | 150138200    | A/G | 0.12 | 326 | silk  | tot sug         | 7-0  | WW             | 2006 | 2.72E-06 |
| 1198    | PZA03569.2                  | 10   | 138760685    | T/G | 0.06 | 335 | ear   | PA              | 7    | WW             | 2006 | 2.96E-06 |
| 490     | PZB01223.1                  | 3    | 192865017    | T/C | 0.10 | 338 | ear   | Glc             | 0    | WS             | 2005 | 3.52E-06 |
| 918     | PZA03583.1                  | 7    | 128404558    | A/G | 0.44 | 316 | silk  | ABA-GE          | 7    | WS             | 2006 | 6.59E-06 |
| 816     | PZB01658.2                  | 6    | 102953670    | A/G | 0.48 | 339 | ear   | tot sug         | 7    | WS             | 2006 | 8.85E-06 |
| 109     | PZB00728.1                  | 1    | 206168095    | T/G | 0.33 | 325 | silk  | Glc             | 7    | WW             | 2006 | 1.04E-05 |
| 224     | PZB02518.1                  | 2    | 5058124      | C/G | 0.32 | 327 | silk  | Glc             | 7    | WW             | 2006 | 1.27E-05 |
| 1155    | PZD00032.1                  | 10   | 30830485     | A/T | 0.11 | 299 | leaf  | PA              | 7    | WS             | 2006 | 1.46E-05 |
| 139     | PZA03301.5                  | 1    | 240574310    | C/A | 0.06 | 340 | ear   | F suc           | 0    | WS             | 2006 | 1.99E-05 |
| 139     | PZA03301.5                  | 1    | 240574310    | C/A | 0.06 | 340 | ear   | F suc           | 0    | WS             | 2006 | 2.11E-05 |
| 109     | PZB00728.1                  | 1    | 206168095    | T/G | 0.33 | 325 | silk  | T sug           | 7    | WW             | 2006 | 2.28E-05 |
| 524     | PZB01619.2                  | 4    | 29030873     | A/C | 0.32 | 321 | silk  | tot sug         | 0    | WS             | 2005 | 2.49E-05 |
| 677     | PZA03371.2                  | 5    | 17231557     | G/C | 0.05 | 349 | silk  | ABA-GE          | 7    | WW             | 2006 | 3.08E-05 |
| 779     | PZA03339.3                  | 5    | 210890786    | A/C | 0.07 | 334 | ear   | ABA             | 0    | WW             | 2006 | 3.50E-05 |
| 758     | PZA03618.2                  | 5    | 193521810    | T/C | 0.13 | 325 | ear   | ABA-GE          | 0    | WW             | 2006 | 3.56E-05 |
| 1062    | PZB01872.1                  | 8    | 172323589    | G/T | 0.11 | 338 | leaf  | PA              | 7    | WW             | 2006 | 3.60E-05 |
| 759     | PZA03618.1                  | 5    | 193521948    | A/C | 0.20 | 318 | silk  | ABA             | 0    | WW             | 2006 | 3.64E-05 |
| 153     | PZA03392.1                  | 1    | 263337248    | C/T | 0.16 | 315 | silk  | PA              | 7    | WW             | 2006 | 3.96E-05 |
| 388     | PZB01947.1                  | 3    | 7410041      | T/C | 0.29 | 295 | silk  | ABA             | 7    | WS             | 2006 | 4.34E-05 |
| 1014    | PZA03395.5                  | 8    | 130388141    | T/C | 0.19 | 335 | silk  | ABA-GE          | 7    | WS             | 2005 | 4.69E-05 |
| 254     | PZB02017.3                  | 2    | 20958616     | T/C | 0.07 | 342 | leaf  | ABA             | 7    | WS             | 2006 | 5.00E-05 |
| 70      | PZA03561.2                  | 1    | 60212360     | G/A | 0.09 | 319 | silk  | Glc             | 7    | WS             | 2005 | 6.08E-05 |
| 742     | PZD00056.3                  | 5    | 176459414    | T/C | 0.21 | 335 | leaf  | Pro             | 0    | WW             | 2006 | 6.09E-05 |
| 996     | PZA03637.3                  | 8    | 118439827    | T/C | 0.06 | 341 | ear   | ABA             | 7    | WS             | 2006 | 6.44E-05 |
| 680     | PZB00223.2                  | 5    | 19973210     | T/C | 0.15 | 300 | leaf  | PA              | 0    | WW             | 2006 | 6.82E-05 |
| 186     | PZB01403.4                  | 1    | 285274032    | A/G | 0.05 | 332 | silk  | PA              | 7    | WW             | 2006 | 6.88E-05 |
| 251     | PZB02017.1                  | 2    | 20958246     | A/T | 0.09 | 342 | ear   | Suc             | 7    | WS             | 2005 | 7.30E-05 |
| 255     | PZA03635.1                  | 2    | 21202350     | C/T | 0.09 | 342 | ear   | Suc             | 7    | WS             | 2005 | 7.95E-05 |
| 186     | PZB01403.4                  | 1    | 285274032    | A/G | 0.05 | 332 | ear   | ABA             | 7    | WS             | 2006 | 8.02E-05 |
| 1146    | PZA03573.4                  | 9    | 150138319    | T/C | 0.06 | 346 | silk  | PA              | 7    | WS             | 2006 | 8.06E-05 |
| 1073    | PZB01042.7                  | 9    | 22040626     | T/C | 0.23 | 344 | leaf  | ABA             | 0    | WS             | 2005 | 8.77E-05 |
| 405     | PZB00137.1                  | 3    | 87822753     | A/G | 0.42 | 317 | ear   | starch          | 0    | WS             | 2005 | 8.81E-05 |
| 337     | PZA03530.2                  | 2    | 186509150    | C/T | 0.11 | 330 | silk  | ABA-GE          | 7    | WS             | 2006 | 9.56E-05 |
| 1080    | PZB02423.1                  | 9    | 28529871     | T/C | 0.05 | 343 | leaf  | ABA             | 0    | WS             | 2005 | 9.68E-05 |

\*Abbreviations and references: SNP number (Yan et al. 2009); SNP context sequence number (www.panzea.org); Chromosome number (Chr); nucleotide position counting from the top of respective chromosome (SNP position); SNP alternative nucleotides (SNP); fraction of lines containing the minor allele (minor allele fraction, MAF); number of maize genotypes for which trait data was usable for testing the SNP-trait association (N); probability that a SNP-trait association is due to random effects, uncorrected for multiple comparisons (P).
